# Supplementary material for: Molecular oxidation-reduction junctions for artificial photosynthetic overall reaction
Source: PubMed Central journal article supplement — Proc Natl Acad Sci U S A. 2022 Sep 26;119(40):e2210550119. doi: 10.1073/pnas.2210550119 (PMC9546620; doi:10.1073/pnas.2210550119), 2022-09-26
Supplement: pnas.2210550119.sapp.pdf [file pnas.2210550119.sapp.pdf]

## Supplementary Information for Molecular Oxidation-Reduction Junctions for Artificial Photosynthetic Overall Reaction

Lei Zhang<sup>1†</sup>, Run-Han Li<sup>1,2†</sup>, Xiao-Xin Li<sup>1†</sup>, Jiang Liu<sup>1\*</sup>, Wei Guan<sup>2</sup>, Long-Zhang Dong<sup>1</sup>, Shun-Li Li<sup>1</sup>,  
Ya-Qian Lan<sup>1\*</sup>

<sup>†</sup>These authors contributed equally to this work

<sup>1</sup> School of Chemistry, South China Normal University, Guangzhou, 510006, P. R. China.

<sup>2</sup> Department of Chemistry, Northeast Normal University, Changchun, 130024, P. R. China.

\*Jiang Liu, \*Ya-Qian Lan

Email: [liuj0828@m.scnu.edu.cn](mailto:liuj0828@m.scnu.edu.cn); [yqlan@m.scnu.edu.cn](mailto:yqlan@m.scnu.edu.cn)

### This PDF file includes:

Supplementary text  
Figures S1 to S30  
Tables S1 to S7

### Supplementary Information Text

All starting materials, reagents and solvents used in experiments were commercially available, high-grade purity materials and used without further purification. Nickel(II) nitrate hexahydrate ( $\text{Ni}(\text{NO}_3)_2 \cdot 6\text{H}_2\text{O}$ , 99.0%), phosphomolybdic acid hydrate ( $\text{H}_3\text{PMo}_{12}\text{O}_{40} \cdot \text{H}_2\text{O}$ , 96%, **PMo<sub>12</sub>** for short), acetone ( $\text{CH}_3\text{COCH}_3$ , 99.5%) were purchased from Sinopharm Chemical Reagent Co. Ltd. Benzotriazole (Hbzt for short, 98%) was purchased from TCI Shanghai Co. Ltd. Pyrazine ( $\text{C}_4\text{H}_4\text{N}_2$ , 99%) was purchased from Shanghai Adamas reagent Co. Ltd. Ethanol ( $\text{CH}_3\text{CH}_2\text{OH}$ , 99.7%) was purchased from Wuxi City Yasheng Chemical Co. Ltd.

**Preparation of Ni<sub>5</sub>** ( $\text{Ni}_5(\text{bzt})_6(\text{NO}_3)_4(\text{H}_2\text{O})_4$ ): A solution of  $\text{Ni}(\text{NO}_3)_2 \cdot 6\text{H}_2\text{O}$  (165 mmol, 48 g), Hbzt (100 mmol, 12 g) and 500 mL acetone was charged in a 500 mL glass beaker and left for slow evaporation. Light-blue crystals were collected after 3 days, and dried in air (85% based on Hbzt).

**Preparation of d-OR:** 100 mg **Ni<sub>5</sub>**, 50 mg **PMo<sub>12</sub>** and 5 mg pyrazine in 4 mL water and 1 mL ethanol were ultrasonically dispersed in a 12 mL Pyrex vial and heat at 85 °C for 72 h. After cooling down to room temperature, light-yellow crystals were obtained (65% based on **Ni<sub>5</sub>**).

**Preparation of a-OR:** 30 mg **Ni<sub>5</sub>**, 100 mg **PMo<sub>12</sub>** and 5 mg pyrazine in 5 mL water and 0.5 mL ethanol were ultrasonically dispersed in a 12 mL Pyrex vial and heat at 85 °C for 72 h. After cooling down to room temperature, light-green crystals were obtained (40% based on **Ni<sub>5</sub>**).

**Preparation of s-OR:** 50 mg **Ni<sub>5</sub>**, 50 mg **PMo<sub>12</sub>** and 20 mg pyrazine in 4 mL water and 1 mL ethanol were ultrasonically dispersed in a 12 mL Pyrex vial and heat at 85 °C for 72 h. After cooling down to room temperature, light-yellow crystals were obtained (50% based on **Ni<sub>5</sub>**).

### Single-Crystal X-ray Analyses

The diffraction data of **a-OR** was collected on a Bruker AXS Apex II CCD diffractometer (Mo  $K\alpha$ ,  $\lambda = 0.71069 \text{ \AA}$ ) at 293 K. The diffraction data of **d-OR** and **s-OR** were measured on a Bruker D8 Venture Photon II detectors at 190 K with a radiation source of Ga ( $K\alpha$ ) ( $\lambda = 1.34139 \text{ \AA}$ ). The crystal structures were solved and refined by full matrix least-squares methods against  $F^2$  using the SHELXL-2018 program package (1-2) and Olex-2 software (3). All non-hydrogen atoms were refined with anisotropic displacement parameters and hydrogen positions were fixed at calculated positions and refined isotropically. The solvent molecules in these structures are highly disordered and not able to be refined by using conventional discrete-atom models; thus, the contribution of partial solvent electron densities was removed by the SQUEEZE routine in PLATON program (4). The crystallographic data and structure refinement for the four compounds are summarized in *SI Appendix*, Table 1. The selected bond lengths and angles are listed in *SI Appendix*, Table 2~4. CCDC 2052395 (for **d-OR**), 2052396 (for **a-OR**) and 2052397 (for **s-OR**) contain the *SI Appendix*, crystallographic data for this paper. These data can be obtained free of charge from The Cambridge Crystallographic Data Centre ([www.ccdc.cam.ac.uk/conts/retrieving.html](http://www.ccdc.cam.ac.uk/conts/retrieving.html)).

### Photocatalysis activity test

All the artificial photosynthesis experiments were performed in a gas-solid system with a home-made quartzose reactor. 10 mg of the photocatalysts (**d-OR**, **a-OR** and **s-OR**) were ground and spread evenly over the bottom of a quartz crucible. Then the quartz crucible was placed in the reactor and 300  $\mu\text{L}$  distill water was added around it (ensure that the photocatalysts can not contact with liquid water). After sealed, the reactor was purged by high-purity  $\text{CO}_2$  (99.999%) for 30 min to remove all the air. A 300W xenon arc lamp (CEL-HXF300, 300-1100 nm) was utilized as an irradiation source. The gases were detected by GC (GC-7900, CEAULIGHT, China) equipped with a flame ionization detector (FID) and a nickel reformer to analyze  $\text{CO}/\text{CO}_2$  and a thermal conductivity (TCD) to analyze  $\text{H}_2/\text{O}_2$ . The isotope-labeled experiments were performed using  $^{13}\text{CO}_2$  instead of  $^{12}\text{CO}_2$  or  $\text{H}_2^{18}\text{O}$  instead of  $\text{H}_2^{16}\text{O}$ , and the products were analyzed using gas chromatography mass spectrometry (GC-MS, 7890B and 5977B, Agilent).  $\text{CO}$ ,  $\text{CH}_4$  and  $\text{O}_2$  were analyzed using a HP-MOLESIEVE,  $\text{C}_2\text{H}_6$  and  $\text{CH}_3\text{CHO}$  were analyzed using a GS-CARBONPLOT.

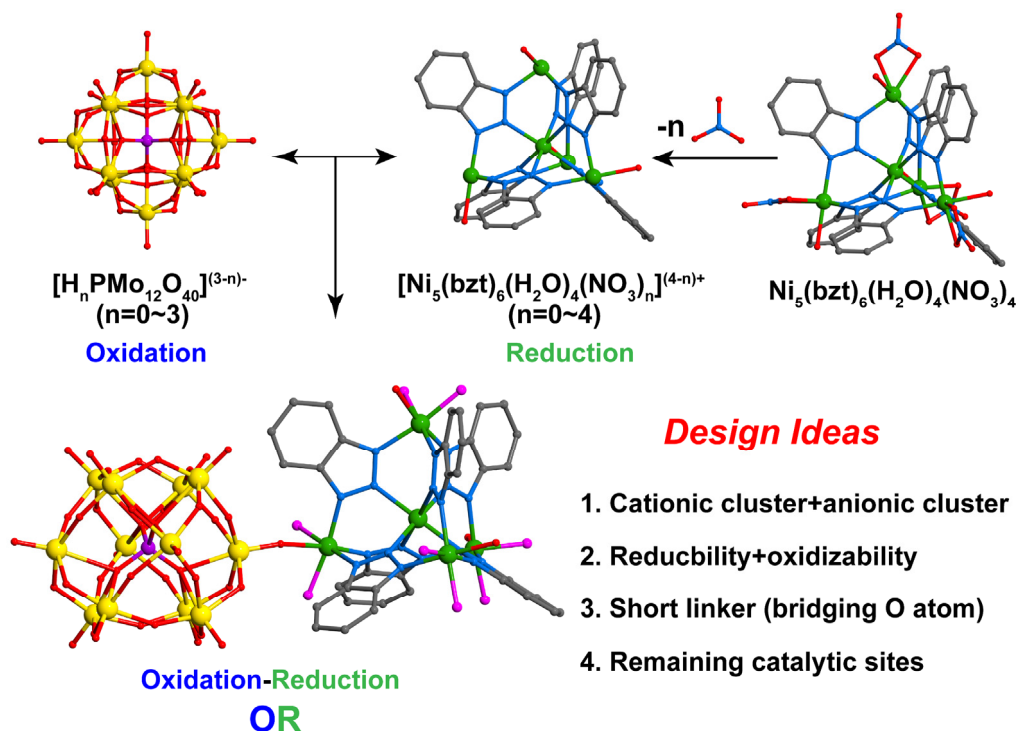

**Fig. S1.** The design ideas of constructing OR photocatalysts by  $Ni_5$  and  $PMo_{12}$  clusters.  $PMo_{12}$  is a kind of classical polyanion with strong oxidative capacity.  $Ni_5$  can be regarded as a cationic unit when the  $NO_3^-$  ions leave. The Ni sites can coordinate with the terminal O atom of  $PMo_{12}$  and remain the active site with reductive capacity (pink ball). All hydrogen atoms are omitted for clarity. Ni, green; Mo, yellow; P, purple; C, gray; N, blue; O, red; solvent molecule, pink.

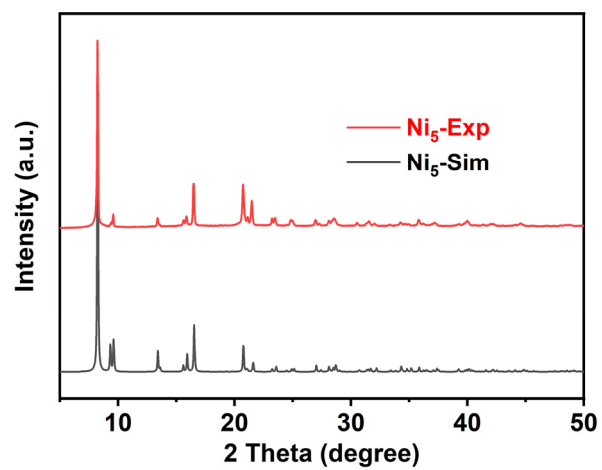

**Fig. S2.** The experimental and simulated PXRD patterns of  $\text{Ni}_5$ . The well-match curves indicate the purity of obtained  $\text{Ni}_5$ .

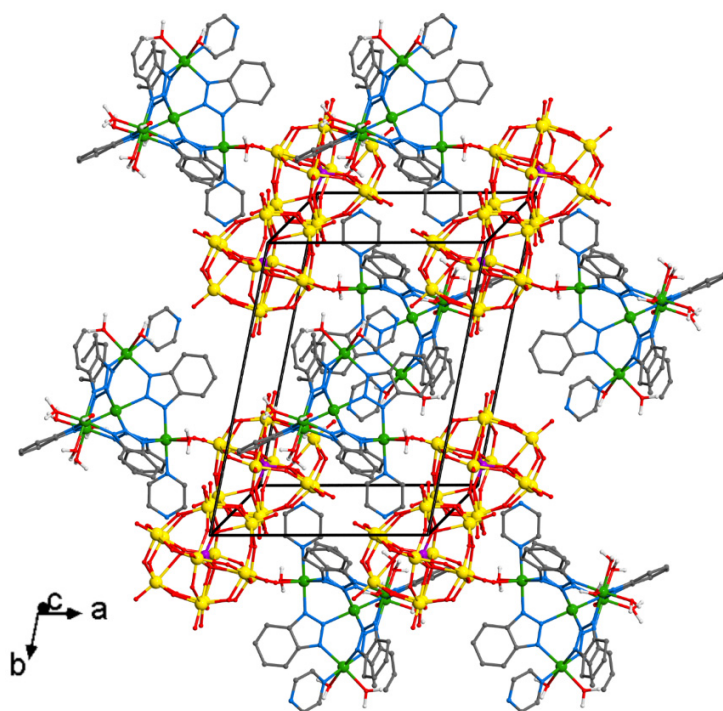

**Fig. S3.** Packing diagram of **d-OR** along *c* axis. Ni, green; Mo, yellow; P, purple; C, gray; N, blue; O, red.

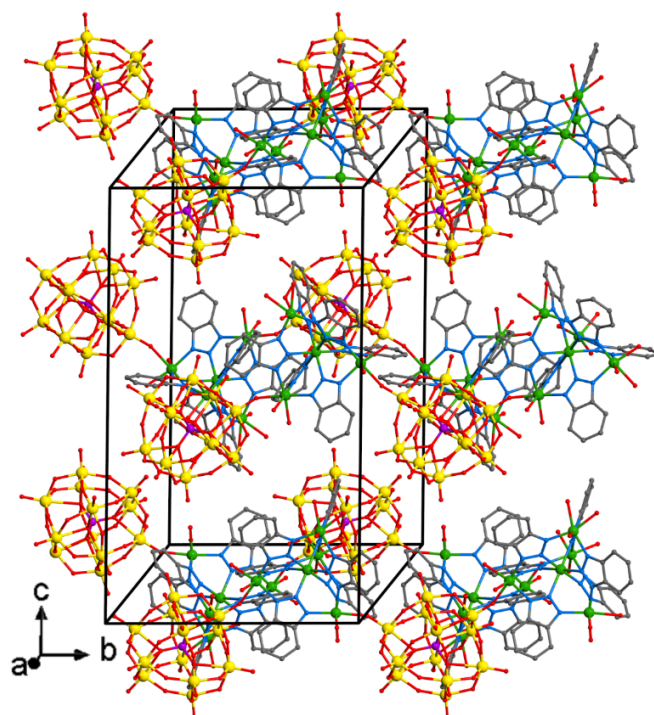

**Fig. S4.** Packing diagram of **d-OR**. Ni, green; Mo, yellow; P, purple; C, gray; N, blue; O, red.

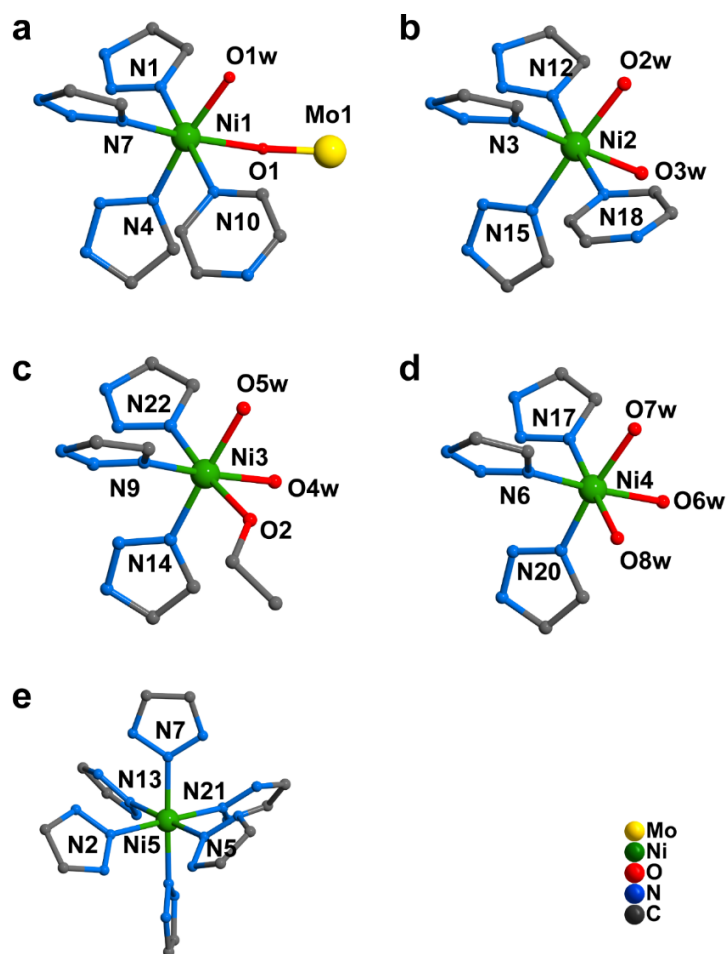

**Fig. S5.** The coordination environment of Ni ions in *d-OR*. Ni1, Ni2, Ni3 and Ni4 can be catalytic sites to reduce CO<sub>2</sub> due to the coordinated solvent molecules. All hydrogen atoms are omitted for clarity. Ni, green; Mo, yellow; C, gray; N, blue; O, red.

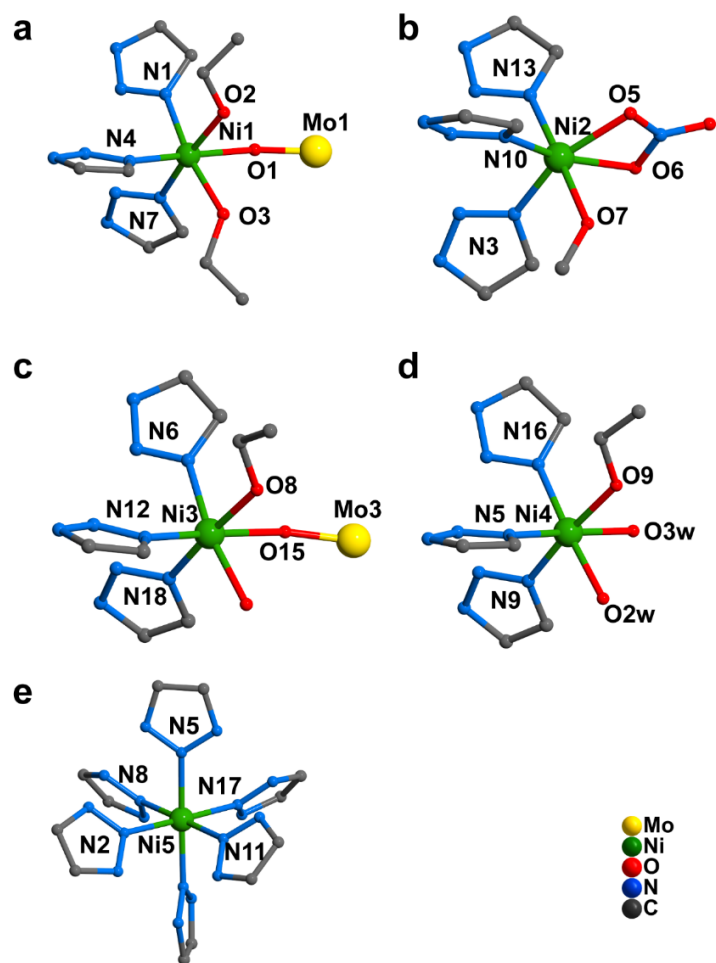

**Fig. S6.** The coordination environment of Ni ions in **a-OR**. It can be found that Ni1, Ni2, Ni3 and Ni4 can be catalytic sites of CO<sub>2</sub>RR. Ni, green; Mo, yellow; C, gray; N, blue; O, red.



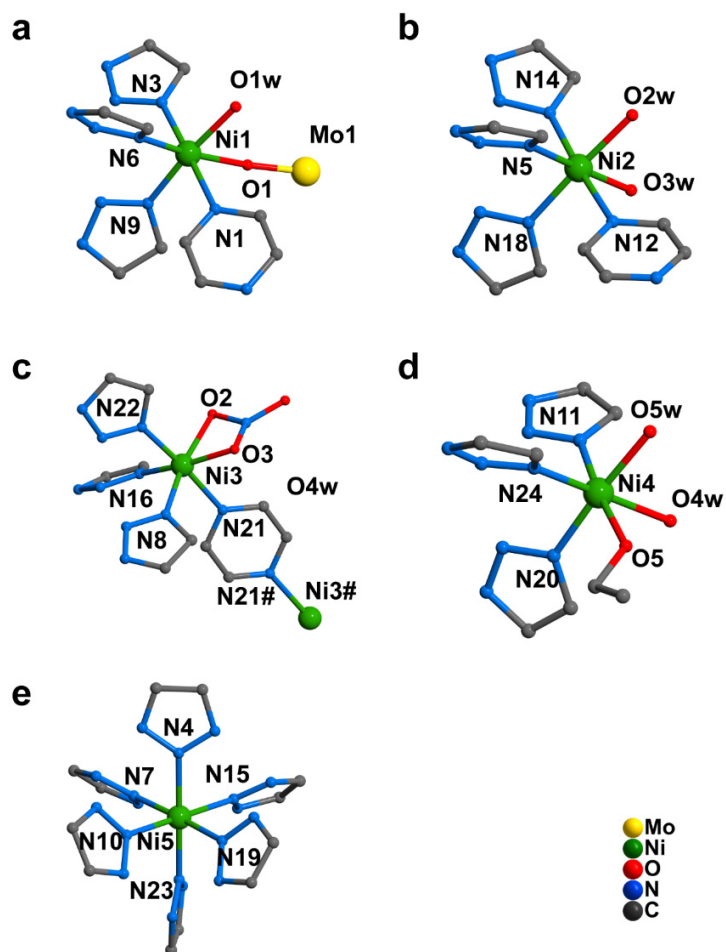

**Fig. S7.** The coordination environment of Ni ions in *s-OR*. It can be found that only Ni1, Ni2 and Ni4 can be catalytic sites of CO<sub>2</sub>RR while Ni3 are six-coordinated without any solvent molecule. Ni, green; Mo, yellow; C, gray; N, blue; O, red

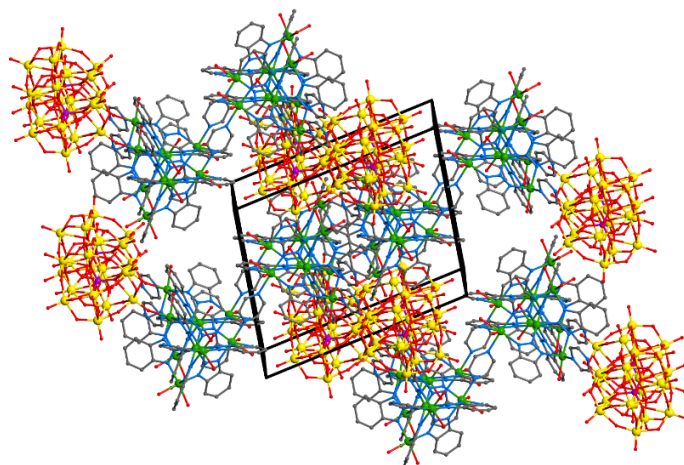

**Fig. S8.** Packing diagram of **s-OR**. Ni, green; Mo, yellow; P, purple; C, gray; N, blue; O, red.

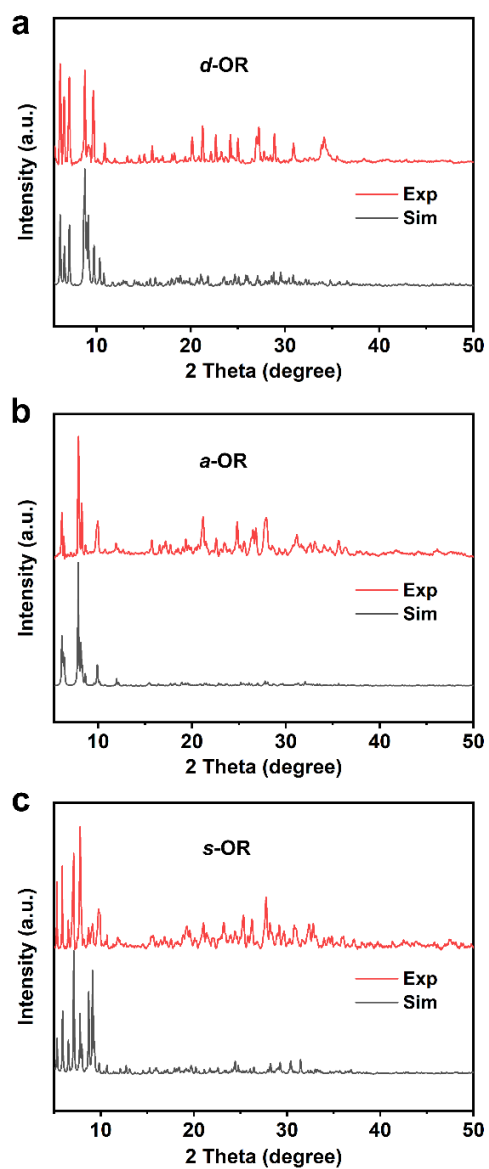

**Fig. S9.** The experimental and simulated PXRD patterns of **d-OR**, **a-OR** and **s-OR**. The well-matched curves suggest the purity of the samples, which provides the premise for the accuracy of subsequent characterization and performance tests.

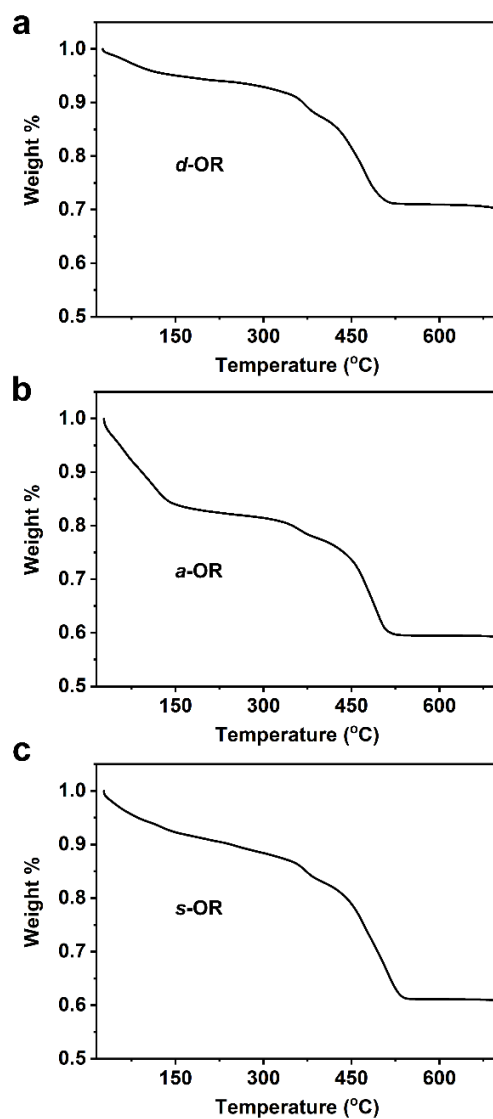

**Fig. S10.** Thermogravimetry curves of **a** *d*-OR; **b** *a*-OR and **c** *s*-OR measured in N<sub>2</sub>/O<sub>2</sub> from room temperature to 700 °C at the heating rate of 20 °C·min<sup>-1</sup>, respectively.

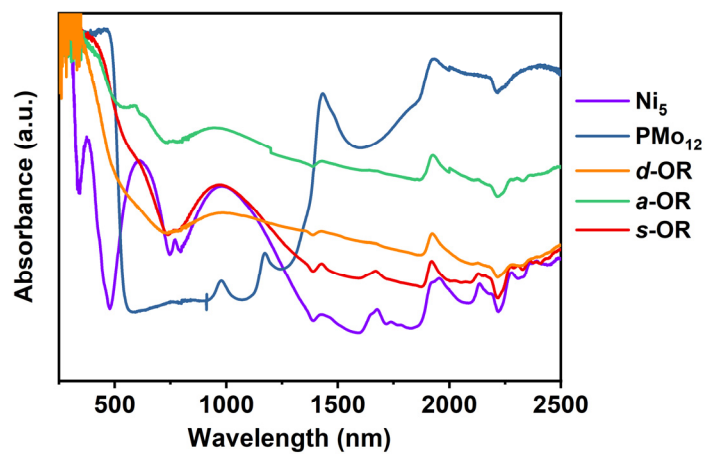

**Fig. S11.** The ultraviolet-visible-near infrared (Uv-Vis-NIR) absorption spectra of  $\text{Ni}_5$  (purple),  $\text{PMo}_{12}$  (blue),  $d\text{-OR}$  (yellow),  $a\text{-OR}$  (green) and  $s\text{-OR}$  (red) of the ranges from 250-2500 nm.

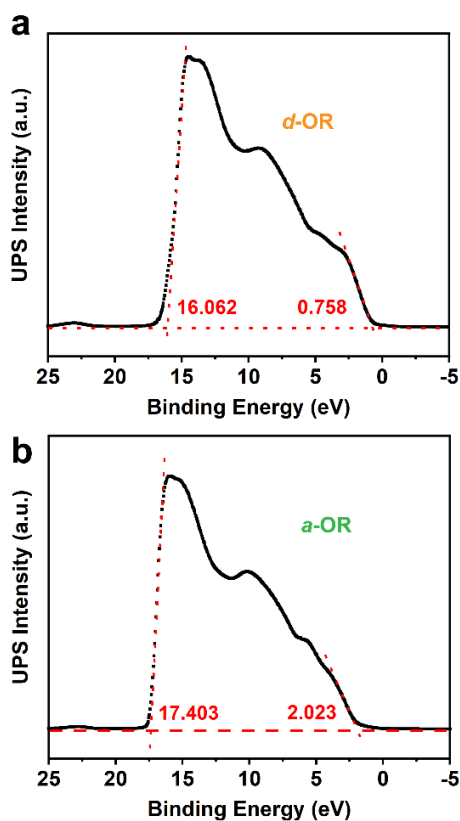

**Fig. S12.** The UPS spectra of **a. d-OR** and **b. a-OR**. In each figure, the horizontal red dotted line is the baseline. The other two red dotted lines are the tangent of the curve. The edges of the UPS spectrum are determined to be the intersection values of the tangents with the baseline. Then the width of the He I UPS spectra is calculated by the different of the two intersection values. The ionization potential (equivalent to the HOMO energy) is calculated by subtracting the width of the He I UPS spectra from the excitation energy (21.22 eV). Hereby, the HOMO of **d-OR** and **a-OR** are calculated to be -5.916 eV and -5.84 eV vs. Ev (vacuum level), related to 1.066 V and 0.99 V vs. normal hydrogen electrode (NHE, pH=7).

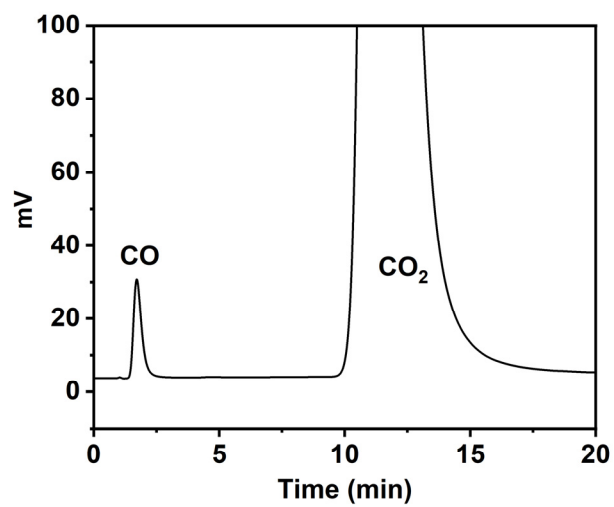

**Fig. S13.** GC analysis of the gaseous reaction products by using the FID (at the second run). Only CO was detected as the product.

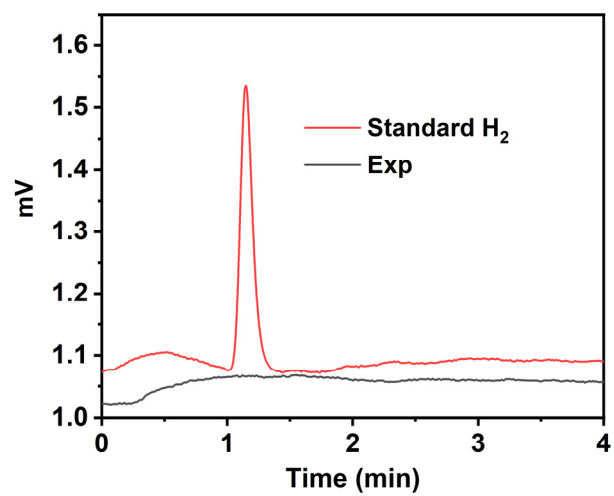

**Fig. S14.** GC analysis of the gaseous reaction products by using the TCD. There was no H<sub>2</sub> detected.



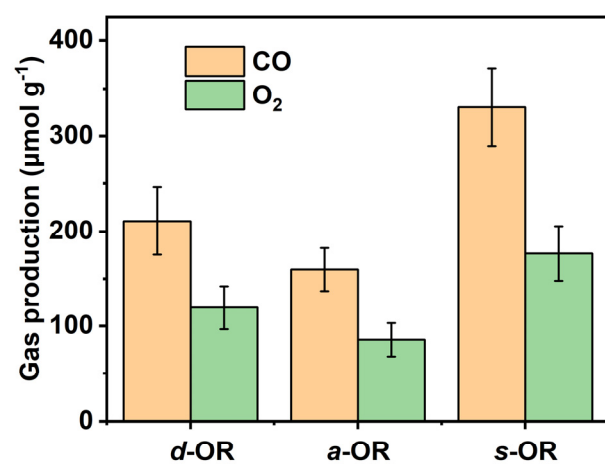

**Fig. S15.** The yields of CO and O<sub>2</sub> catalyzed by **d-OR**, **a-OR** and **s-OR** and detected on an online system.

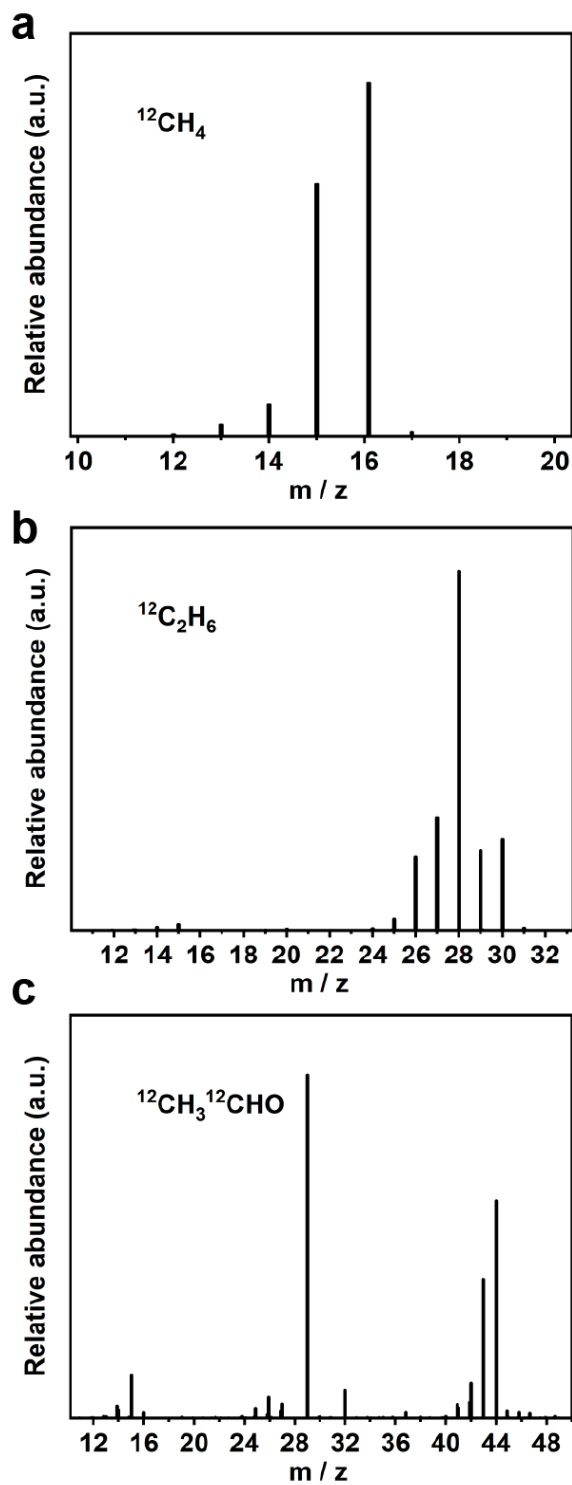

**Fig. S16.** Mass spectra extracted from GC-MS analysis of **a.**  $\text{CH}_4$ ; **b.**  $\text{C}_2\text{H}_6$  and **c.**  $\text{CH}_3\text{CHO}$  products from  $^{13}\text{CO}_2$  reduction. Neither the produced  $\text{CH}_4$ ,  $\text{C}_2\text{H}_6$  nor  $\text{CH}_3\text{CHO}$  is converted from  $\text{CO}_2$ .

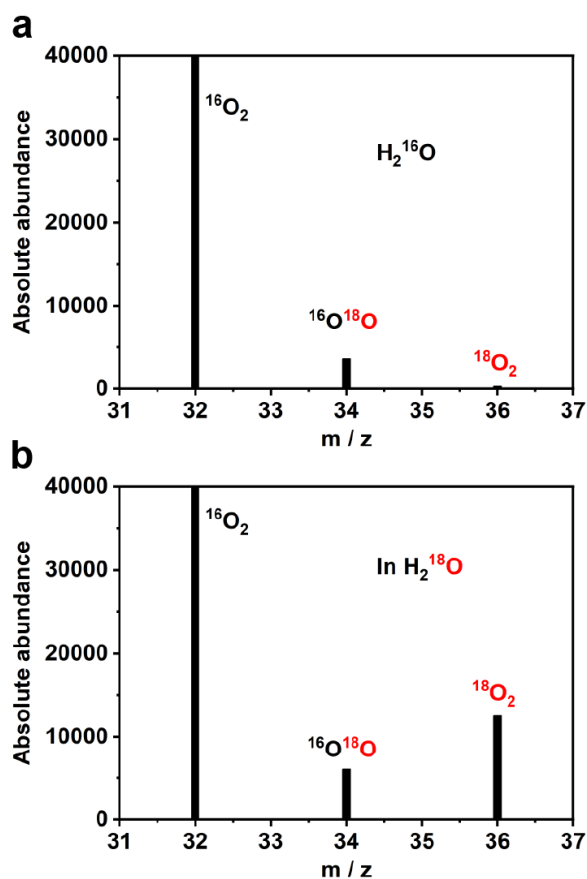

**Fig. S17.** Mass spectra extracted from GC-MS analysis of O<sub>2</sub> product from the photocatalytic reaction using **a.** H<sub>2</sub><sup>16</sup>O and **b.** H<sub>2</sub><sup>18</sup>O. When using H<sub>2</sub><sup>16</sup>O in reaction system, two weak signals at m/z 34 and 36 corresponding to <sup>16</sup>O<sup>18</sup>O and <sup>18</sup>O<sub>2</sub> could be observed because of the natural existence of isotopic <sup>18</sup>O. When the reaction was performed using H<sub>2</sub><sup>18</sup>O, the signals at m/z 34 and 36 were obviously enhanced. The abundance of <sup>18</sup>O<sub>2</sub> using H<sub>2</sub><sup>18</sup>O as reactant was near 50 times than that of using H<sub>2</sub><sup>16</sup>O, which proved that the O<sub>2</sub> product was indeed convert from H<sub>2</sub>O.

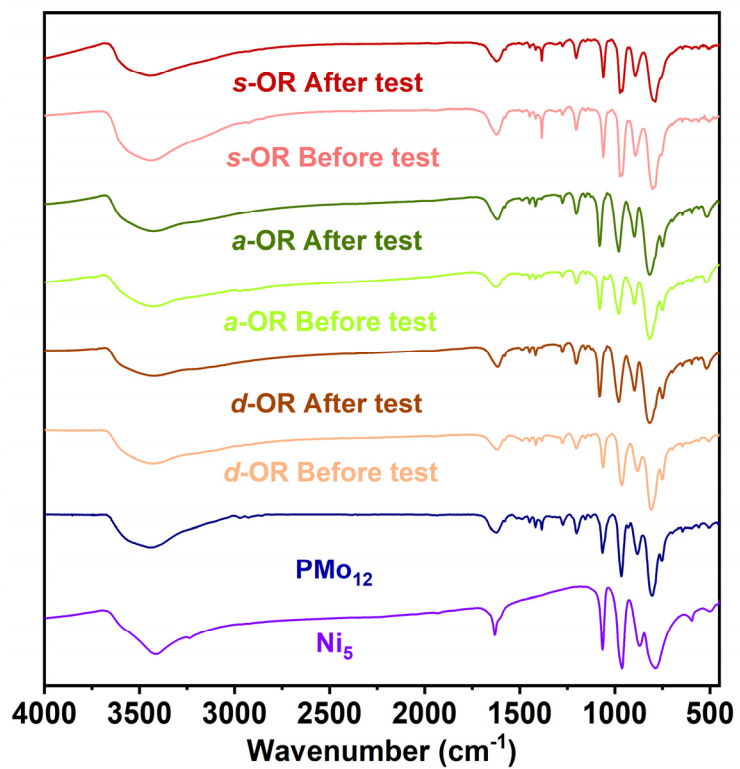

**Fig. S18.** The FTIR spectra for Ni<sub>5</sub> (purple), PMo<sub>12</sub> (blue) and FTIR spectra for *d*-OR, *a*-OR and *s*-OR before and after catalysis.

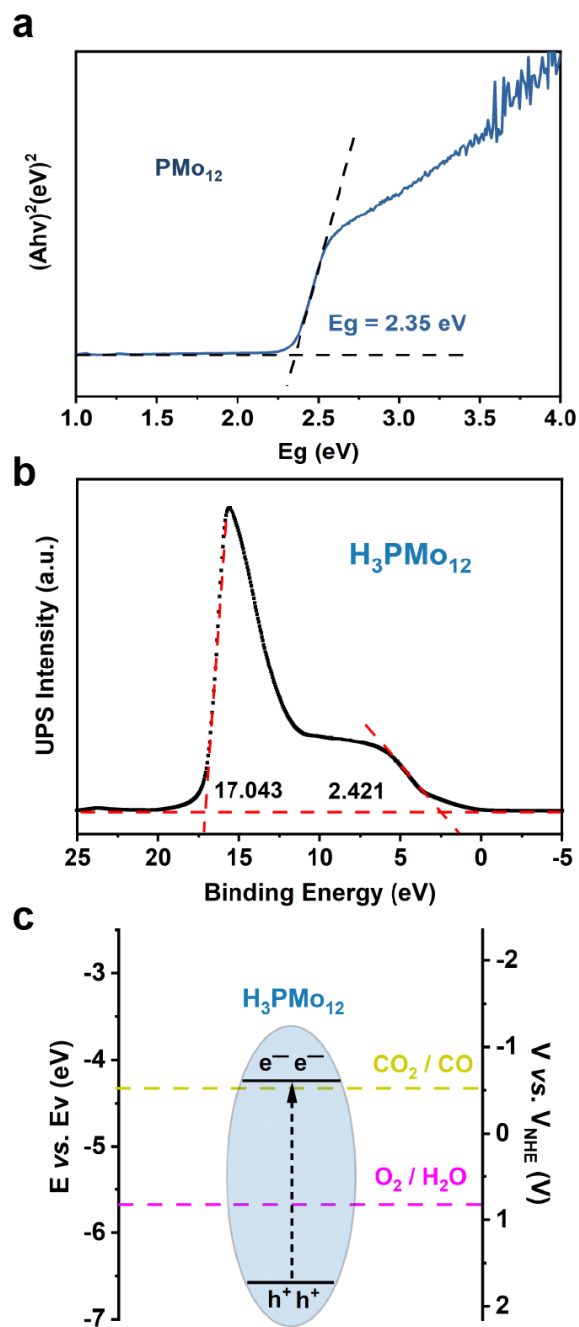

Fig. S19. a. band gap b. UPS spectrum and c. band structure of  $\text{PMo}_{12}$ .

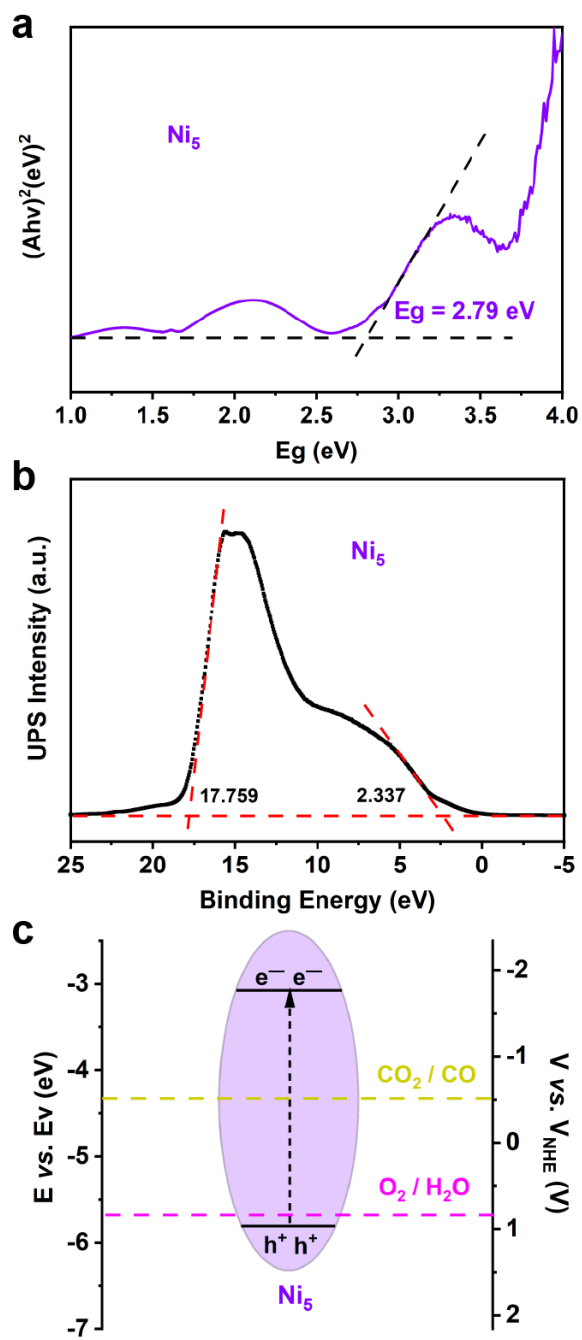

Fig. S20. a. band gap b. UPS spectrum and c. band structure of  $\text{Ni}_5$ .

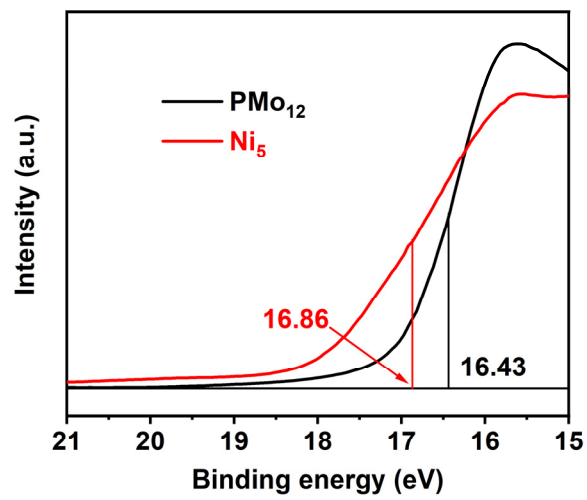

**Fig. S21.** Photoemission cutoff of  $\text{PMo}_{12}$  and  $\text{Ni}_5$  obtained from UPS. The Fermi level for  $\text{PMo}_{12}$  and  $\text{Ni}_5$  is calculated to be 4.36 eV and 4.79 eV respectively.

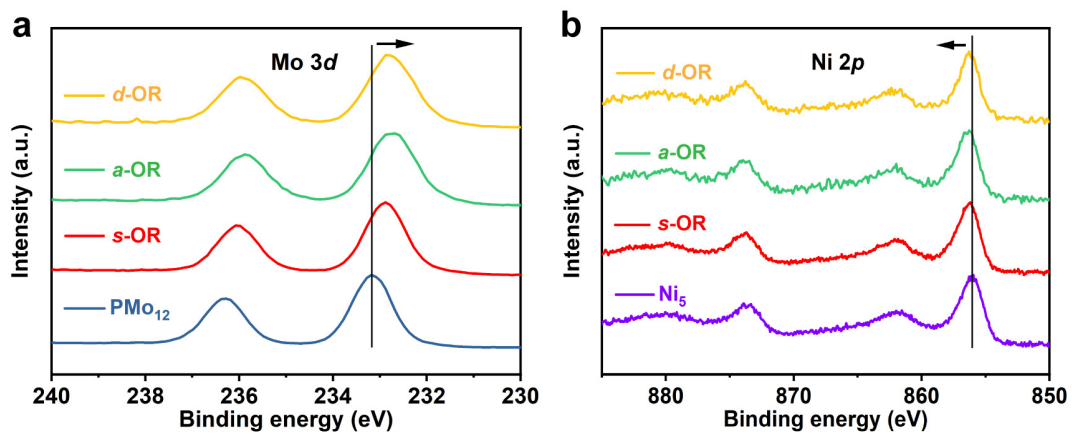

**Fig. S22.** High-resolution a. Mo 3d and b. Ni 2p XPS spectra of **d-OR**, **a-OR**, **s-OR**, **P<sub>Mo</sub><sub>12</sub>** and **Ni<sub>5</sub>**. The positive shift in Mo 3d and the negative shift in Ni 2p of **d-OR**, **a-OR** and **s-OR** reveal that electrons of **Ni<sub>5</sub>** transfer to **P<sub>Mo</sub><sub>12</sub>** when they connect together through a bridging O atom.



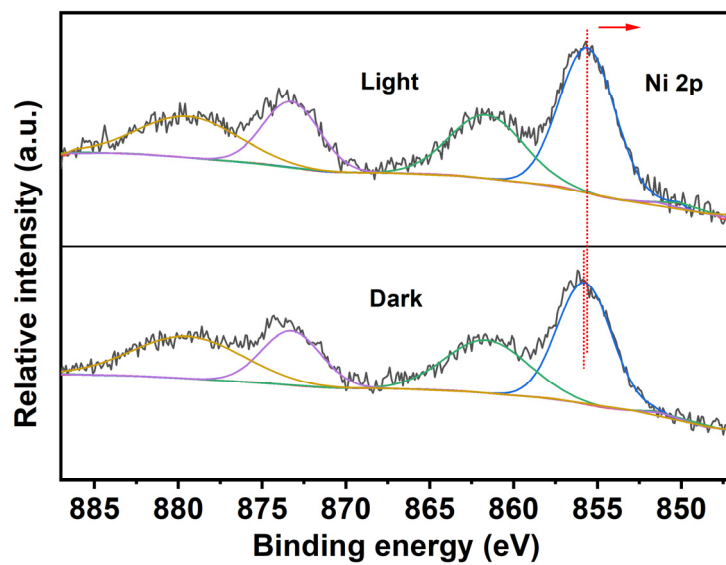

Fig. S23. High-resolution in-situ XPS for Ni 2p of *d*-OR in the dark and under light irradiation.

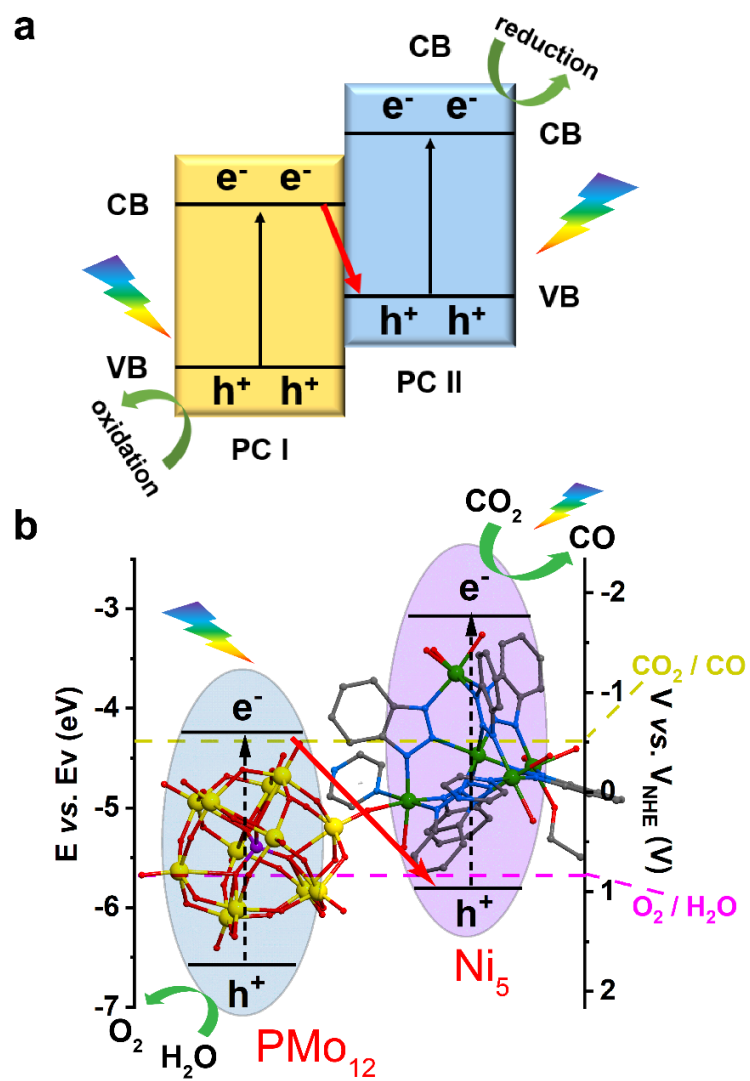

**Fig. S24.** Schematic diagram of electron transfer in **a.** Z-scheme heterojunction and **b.** OR molecule junction.

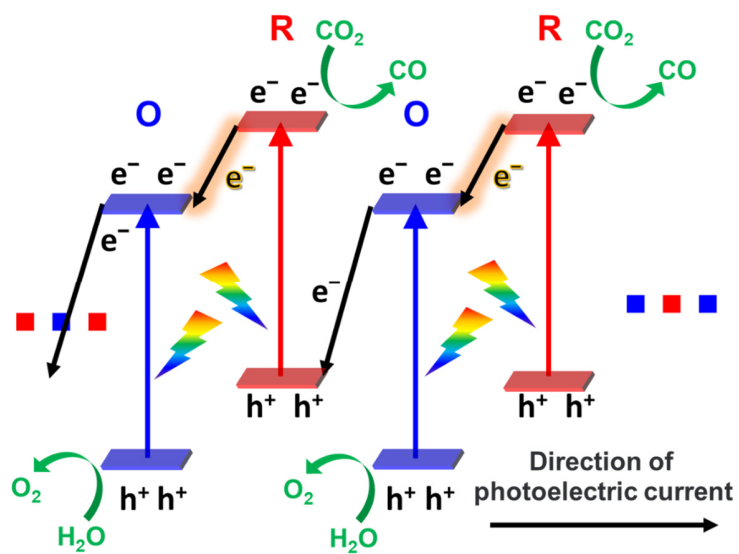

Fig. S25. Proposed charge transfer in a-OR photocatalyst.

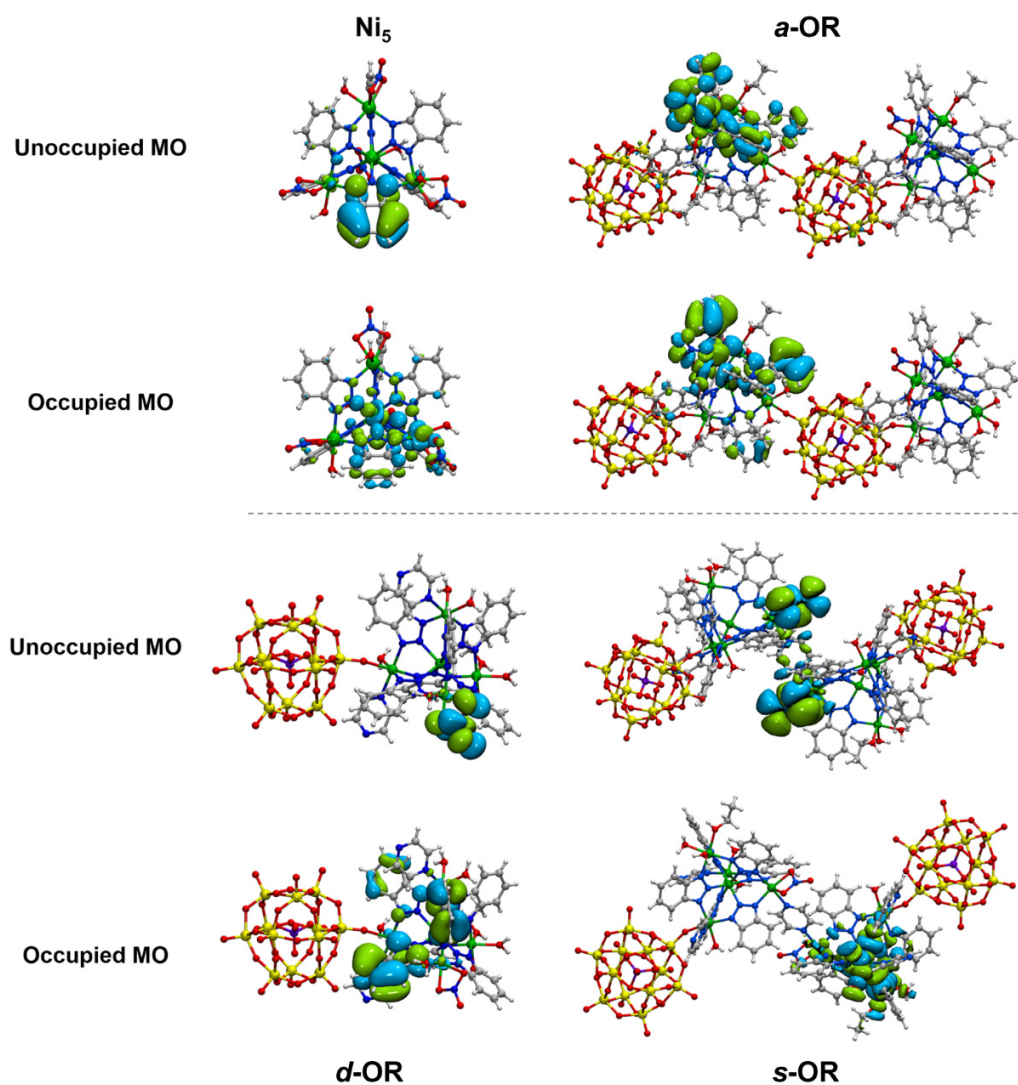

**Fig. S26.** Frontier molecular orbitals of Ni-cluster moieties of **Ni<sub>5</sub>**, **d-OR**, **a-OR**, and **s-OR** marked in **Fig. 4e**.

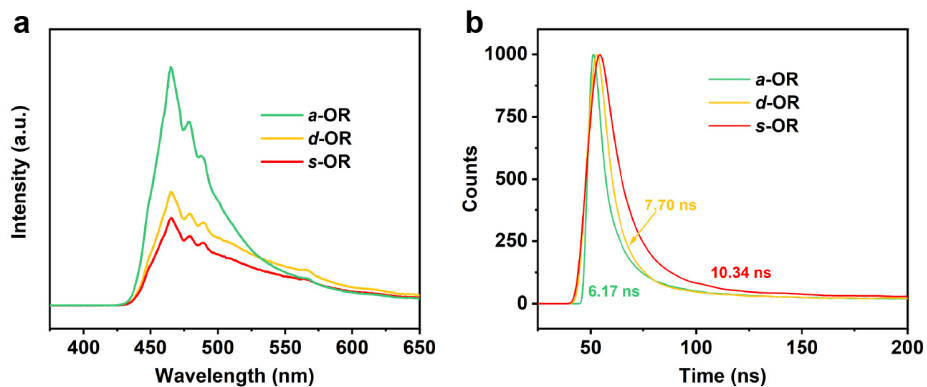

**Fig. S27.** **a.** PL emissions of **d-OR**, **a-OR** and **s-OR** under excitation at 365 nm. The PL intensity of **s-OR** is weaker than **d-OR** and much weaker than **a-OR**, which indicates that **s-OR** has the weakest efficiency of electron-hole recombination. **b.** Decay curves of **d-OR**, **a-OR** and **s-OR** by using 365 nm laser irradiation.

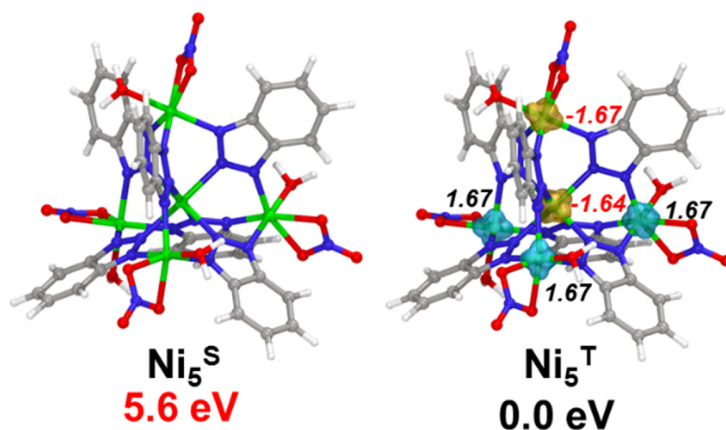

**Fig. S28.** Structures of triplet and singlet  $\text{Ni}_5$  complexes. The Gibbs free energies relative to the most stable  $\text{Ni}_5^{\text{T}}$  conformation are given in eV. White, gray, purple, red and green spheres represent H, C, N, O and Ni atoms, respectively. To identify the stable catalytic activity species, we investigated the different spin states of the  $\text{Ni}_5$  complex using unrestricted open-shell DFT at the same level, respectively. The triplet state  $\text{Ni}_5^{\text{T}}$  is proved more stable, which is consistent with the previous experimental reports. (The  $\text{Ni}_5$  mentioned in this paper corresponded triplet  $\text{Ni}_5^{\text{T}}$ )

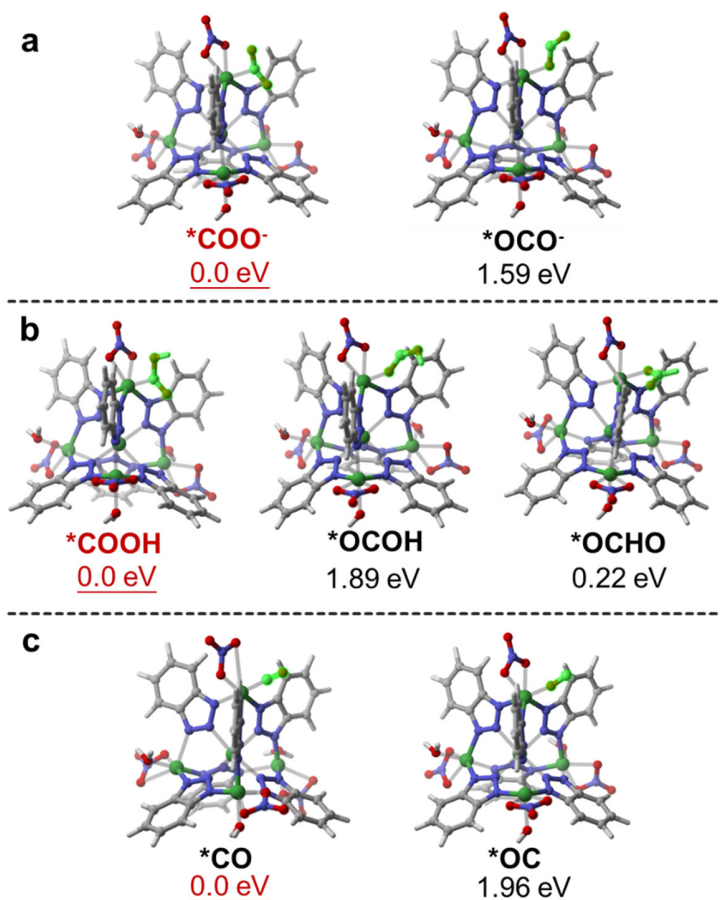

**Figure S29.** Evaluations of adsorption possibilities of active species. The Gibbs free energies are given in eV. White, gray, purple, red and green spheres represent H, C, N, O and Ni atoms, respectively. The results show that the intermediates \*COO<sup>-</sup>, \*COOH and \*CO are more stable.

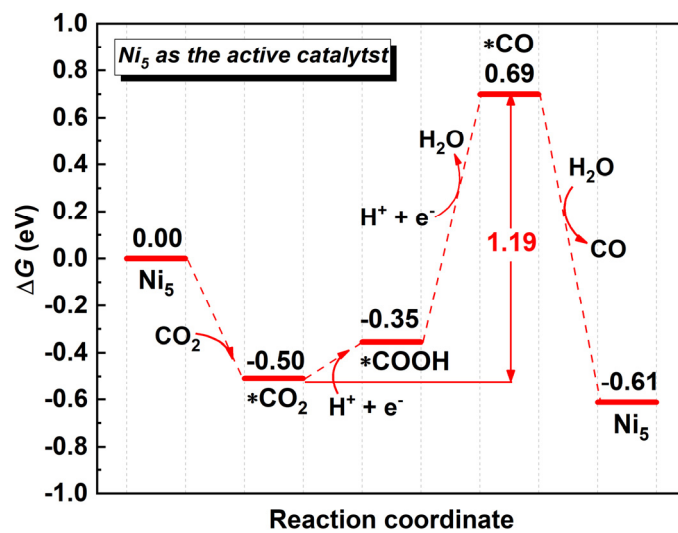

**Fig. S30.** Gibbs energy profile for the  $\text{CO}_2$  reduction process to CO production with the natural  $\text{Ni}_5$  as the catalytic center.



**Table S1.** Crystal data and structure refinement of **d-OR**, **a-OR** and **s-OR**.

|                                             | <b>d-OR</b>                                                                                        | <b>a-OR</b>                                                                                                         | <b>s-OR</b>                                                                                                         |
|---------------------------------------------|----------------------------------------------------------------------------------------------------|---------------------------------------------------------------------------------------------------------------------|---------------------------------------------------------------------------------------------------------------------|
| <b>Empirical formula</b>                    | C <sub>48</sub> H <sub>73</sub> Mo <sub>12</sub> N <sub>23</sub> Ni <sub>5</sub> O <sub>60</sub> P | C <sub>100</sub> H <sub>147</sub> Mo <sub>24</sub> N <sub>38</sub> Ni <sub>10</sub> O <sub>110</sub> P <sub>2</sub> | C <sub>100</sub> H <sub>112</sub> Mo <sub>24</sub> N <sub>48</sub> Ni <sub>10</sub> O <sub>100</sub> P <sub>2</sub> |
| <b>Formula weight</b>                       | 3408.09                                                                                            | 6593.15                                                                                                             | 6537.97                                                                                                             |
| <b>Crystal system</b>                       | triclinic                                                                                          | monoclinic                                                                                                          | triclinic                                                                                                           |
| <b>Space group</b>                          | <i>P</i> -1                                                                                        | <i>P</i> 2 <sub>1</sub> / <i>c</i>                                                                                  | <i>P</i> -1                                                                                                         |
| <b>a (Å)</b>                                | 15.2675(4)                                                                                         | 22.668(5)                                                                                                           | 15.4976(6)                                                                                                          |
| <b>b (Å)</b>                                | 19.4380(5)                                                                                         | 17.901(4)                                                                                                           | 19.5345(7)                                                                                                          |
| <b>c (Å)</b>                                | 19.8495(5)                                                                                         | 30.223(8)                                                                                                           | 21.2881(8)                                                                                                          |
| <b>α (°)</b>                                | 114.2540(10)                                                                                       | 90                                                                                                                  | 66.957(2)                                                                                                           |
| <b>β (°)</b>                                | 105.7230(10)                                                                                       | 107.304(4)                                                                                                          | 74.645(2)                                                                                                           |
| <b>γ (°)</b>                                | 94.1390(10)                                                                                        | 90                                                                                                                  | 85.217(2)                                                                                                           |
| <b>V (Å<sup>3</sup>)</b>                    | 5055.6(2)                                                                                          | 11709(5)                                                                                                            | 5717.3(4)                                                                                                           |
| <b>Z</b>                                    | 2                                                                                                  | 2                                                                                                                   | 1                                                                                                                   |
| <b>D<sub>calc</sub>(g·cm<sup>-3</sup>)</b>  | 2.239                                                                                              | 1.870                                                                                                               | 1.899                                                                                                               |
| <b>Abs.coeff. (mm<sup>-1</sup>)</b>         | 13.630                                                                                             | 2.119                                                                                                               | 11.992                                                                                                              |
| <b>F(000)</b>                               | 3322.0                                                                                             | 6422.0                                                                                                              | 3166.0                                                                                                              |
| <b>Reflns collected</b>                     | 51291                                                                                              | 106272                                                                                                              | 88520                                                                                                               |
| <b>Data/restraints /parameters</b>          | 20287/12/1365                                                                                      | 26837/46/1308                                                                                                       | 25110/21/1287                                                                                                       |
| <b>GO<sub>F</sub>on F<sup>2</sup></b>       | 1.047                                                                                              | 1.011                                                                                                               | 0.985                                                                                                               |
| <b>R<sub>int</sub></b>                      | 0.0416                                                                                             | 0.0469                                                                                                              | 0.0780                                                                                                              |
| <b>R<sub>1</sub><sup>a</sup></b>            | 0.1235                                                                                             | 0.0924                                                                                                              | 0.0825                                                                                                              |
| <b>wR<sub>2</sub>(all data)<sup>b</sup></b> | 0.2016                                                                                             | 0.1323                                                                                                              | 0.1623                                                                                                              |

$$^a R_1 = \frac{\sum ||F_o| - |F_c||}{\sum |F_o|} \quad ^b wR_2 = \frac{\sum w(|F_o|^2 - |F_c|^2)}{\sum w(F_o^2)^{1/2}}$$

**Table S2.** Selected bond distance (Å) of **d-OR**.

| Atom1 | Atom2 | Distance (Å) | Atom1 | Atom2 | Distance (Å) |
|-------|-------|--------------|-------|-------|--------------|
| Mo1   | O1    | 1.696(8)     | Ni3   | O2    | 2.123(11)    |
| Mo1   | O3    | 1.839(8)     | Ni3   | O4w   | 2.078(11)    |
| Mo1   | O13   | 1.980(9)     | Ni3   | O5w   | 2.079(11)    |
| Mo1   | O20   | 1.823(9)     | Ni3   | N9    | 2.063(11)    |
| Mo1   | O27   | 2.004(9)     | Ni3   | N14   | 2.034(11)    |
| Mo1   | O40   | 2.380(8)     | Ni3   | N22   | 2.035(11)    |
| Ni1   | O1    | 2.250(8)     | Ni4   | O6w   | 2.063(9)     |
| Ni1   | O1w   | 2.075(9)     | Ni4   | O7w   | 2.100(9)     |
| Ni1   | N1    | 2.042(10)    | Ni4   | O8w   | 2.109(8)     |
| Ni1   | N4    | 2.035(10)    | Ni4   | N6    | 2.050(10)    |
| Ni1   | N7    | 2.037(11)    | Ni4   | N17   | 2.067(10)    |
| Ni1   | N10   | 2.147(10)    | Ni4   | N20   | 2.016(12)    |
| Ni2   | O2W   | 2.124(10)    | Ni5   | N2    | 2.160(9)     |
| Ni2   | O3W   | 2.128(10)    | Ni5   | N5    | 2.120(10)    |
| Ni2   | N3    | 2.057(9)     | Ni5   | N8    | 2.103(11)    |
| Ni2   | N12   | 2.062(11)    | Ni5   | N13   | 2.129(10)    |
| Ni2   | N15   | 2.058(10)    | Ni5   | N16   | 2.125(10)    |
| Ni2   | N18   | 2.107(13)    | Ni5   | N21   | 2.123(10)    |

**Table S3.** Selected bond distance (Å) of **a-OR**.

| Atom1 | Atom2 | Distance (Å) | Atom1 | Atom2            | Distance (Å) |
|-------|-------|--------------|-------|------------------|--------------|
| Mo1   | O1    | 1.702(4)     | Ni3   | O1w              | 2.084(4)     |
| Mo1   | O12   | 1.887(4)     | Ni3   | O8               | 2.115(4)     |
| Mo1   | O22   | 1.936(4)     | Ni3   | O15 <sup>1</sup> | 2.198(4)     |
| Mo1   | O23   | 1.898(4)     | Ni3   | N6               | 2.040(5)     |
| Mo1   | O35   | 1.900(4)     | Ni3   | N12              | 2.021(5)     |
| Mo1   | O48   | 2.396(4)     | Ni3   | N18              | 2.045(5)     |
| Ni1   | O1    | 2.177(4)     | Ni4   | O2w              | 2.102(4)     |
| Ni1   | O2    | 2.106(4)     | Ni4   | O3w              | 2.106(4)     |
| Ni1   | O3    | 2.116(4)     | Ni4   | O9               | 2.132(4)     |
| Ni1   | N1    | 2.045(5)     | Ni4   | N9               | 2.049(5)     |
| Ni1   | N4    | 2.030(5)     | Ni4   | N15              | 2.054(5)     |
| Ni1   | N7    | 2.039(4)     | Ni4   | N16              | 2.067(5)     |
| Ni2   | O5    | 2.138(5)     | Ni5   | N2               | 2.111(5)     |
| Ni2   | O6    | 2.116(5)     | Ni5   | N5               | 2.144(4)     |
| Ni2   | O7    | 2.167(4)     | Ni5   | N8               | 2.129(4)     |
| Ni2   | N3    | 2.008(5)     | Ni5   | N11              | 2.125(5)     |
| Ni2   | N10   | 2.003(5)     | Ni5   | N14              | 2.148(5)     |
| Ni2   | N13   | 2.051(5)     | Ni5   | N17              | 2.102(4)     |

<sup>1</sup>+X, -1+Y, +Z

**Table S4.** Selected bond distance (Å) of **s-OR**.

| Atom1 | Atom2 | Distance (Å) | Atom1 | Atom2 | Distance (Å) |
|-------|-------|--------------|-------|-------|--------------|
| Mo1   | O1    | 1.703(4)     | Ni3   | O2    | 2.123(7)     |
| Mo1   | O6    | 1.846(4)     | Ni3   | O3    | 2.084(6)     |
| Mo1   | O16   | 1.954(4)     | Ni3   | N8    | 2.034(5)     |
| Mo1   | O22   | 1.827(5)     | Ni3   | N16   | 2.014(6)     |
| Mo1   | O29   | 1.998(4)     | Ni3   | N17   | 2.430(13)    |
| Mo1   | O42   | 2.395(4)     | Ni3   | N21   | 2.207(6)     |
| Ni1   | O1    | 2.207(5)     | Ni3   | N22   | 2.064(5)     |
| Ni1   | O1w   | 2.067(4)     | Ni4   | O4w   | 2.115(5)     |
| Ni1   | N1    | 2.154(5)     | Ni4   | O5    | 2.096(4)     |
| Ni1   | N3    | 2.053(5)     | Ni4   | O5w   | 2.101(5)     |
| Ni1   | N6    | 2.049(6)     | Ni4   | N20   | 2.065(5)     |
| Ni1   | N9    | 2.053(5)     | Ni4   | N24   | 2.039(6)     |
| Ni2   | O2w   | 2.078(5)     | Ni5   | N4    | 2.125(5)     |
| Ni2   | O3w   | 2.120(6)     | Ni5   | N7    | 2.103(5)     |
| Ni2   | N5    | 2.083(5)     | Ni5   | N10   | 2.123(5)     |
| Ni2   | N12   | 2.109(6)     | Ni5   | N15   | 2.105(5)     |
| Ni2   | N14   | 2.038(6)     | Ni5   | N19   | 2.110(5)     |
| Ni2   | N18   | 2.059(5)     | Ni5   | N23   | 2.143(5)     |

**Table S5.** The CO yield under different experimental conditions catalyzed by **d-OR**, **a-OR** and **s-OR**.

| entry | d-OR ( $\mu\text{mol/g}$ ) | a-OR ( $\mu\text{mol/g}$ ) | s-OR ( $\mu\text{mol/g}$ ) |
|-------|----------------------------|----------------------------|----------------------------|
| 1     | 202.88                     | 150.12                     | 291.25                     |
| 2     | 152.70                     | 112.19                     | 238.68                     |
| 3     | 49.45                      | 28.75                      | 46.19                      |
| 4     | n.d. <sup>(a)</sup>        | n.d.                       | n.d.                       |
| 5     | 47.18                      | 29.43                      | 49.11                      |
| 6     | n.d.                       | n.d.                       | n.d.                       |
| 7     | n.d.                       | n.d.                       | n.d.                       |
| 8     | n.d.                       |                            |                            |
| 9     | 2447.13                    | 1703.69                    | 3779.15                    |

1. 10 mg photocatalysts, CO<sub>2</sub> (1 atm), H<sub>2</sub>O (0.3 mL), 10 hours, under irradiation. (The CO yield in the first run)

2. 10 mg photocatalysts, CO<sub>2</sub> (1 atm), H<sub>2</sub>O (0.3 mL), 10 hours, under irradiation. (The average CO yield in the next four runs)

3. 10 mg photocatalysts, Ar (1 atm), H<sub>2</sub>O (0.3 mL), 10 hours, under irradiation. (The CO yield in the first run)

4. 10 mg photocatalysts, Ar (1 atm), H<sub>2</sub>O (0.3 mL), 10 hours, under irradiation. (The CO yield in the second run)

5. 10 mg photocatalysts, CO<sub>2</sub> (1 atm), without H<sub>2</sub>O, 10 hours, under irradiation. (The CO yield in the first run)

6. 10 mg photocatalysts, CO<sub>2</sub> (1 atm), without H<sub>2</sub>O, 10 hours, under irradiation. (The CO yield in the second run)

7. 10 mg photocatalysts, CO<sub>2</sub> (1 atm), H<sub>2</sub>O (0.3 mL), 10 hours, in dark.

8. no photocatalyst, CO<sub>2</sub> (1 atm), H<sub>2</sub>O (0.3 mL), 10 hours, under irradiation.

9. 10 mg photocatalysts, CO<sub>2</sub> (1 atm), H<sub>2</sub>O (0.3 mL), 200 hours, under irradiation. (The photocatalysts were pretreated by irradiating for 10 h)

<sup>(a)</sup> n.d. = Not detectable

**Table S6.** Fitted lifetimes of the fluorescence decay profiles of **d-OR**, **a-OR** and **s-OR**.

|             | A1 %  | T1 / ns | A2 %  | T2 / ns |
|-------------|-------|---------|-------|---------|
| <b>d-OR</b> | 80.14 | 6.80    | 19.68 | 109.66  |
| <b>a-OR</b> | 75.11 | 6.05    | 24.89 | 50.36   |
| <b>s-OR</b> | 82.15 | 9.84    | 17.85 | 119.59  |

**Table S7.** XYZ structure files for the structures mentioned in **Fig. S29**.

| <b>Ni<sub>5</sub><sup>S</sup></b> |            |            |            |
|-----------------------------------|------------|------------|------------|
| Ni                                | -0.0112173 | -0.0228114 | -0.0192959 |
| Ni                                | 2.7383127  | 0.4543346  | -2.3589689 |
| O                                 | 3.5521707  | 1.7976566  | -3.9165749 |
| O                                 | 4.8112057  | 0.9681006  | -2.3848599 |
| O                                 | 5.6919077  | 2.1906096  | -3.9546829 |
| O                                 | 3.2485817  | -1.0565774 | -3.7605299 |
| N                                 | 2.1938387  | 1.9452466  | -1.0397549 |
| N                                 | 1.2909447  | 1.6918086  | -0.1068089 |
| N                                 | 1.0704077  | 2.7411336  | 0.6555961  |
| N                                 | -0.1952013 | 0.1320926  | -2.1097489 |
| N                                 | 0.8227477  | 0.2369786  | -2.9378329 |
| N                                 | 4.7194977  | 1.6663286  | -3.4461589 |
| C                                 | 2.5904697  | 3.2442276  | -0.8913569 |
| C                                 | 3.5009497  | 4.0662496  | -1.5969819 |
| H                                 | 4.0455387  | 3.7298426  | -2.4743569 |
| C                                 | 3.6570807  | 5.3660886  | -1.1482959 |
| H                                 | 4.3504287  | 6.0286316  | -1.6727469 |
| C                                 | 2.9321577  | 5.8750486  | -0.0346719 |
| H                                 | 3.0881057  | 6.9135896  | 0.2681781  |
| C                                 | 2.0271227  | 5.0917596  | 0.6570581  |
| H                                 | 1.4427047  | 5.4814386  | 1.4898621  |
| C                                 | 1.8664277  | 3.7577946  | 0.2128961  |
| C                                 | 0.3261337  | 0.3131236  | -4.2061229 |
| C                                 | 0.9502757  | 0.4461046  | -5.4666499 |
| H                                 | 2.0343847  | 0.5059916  | -5.5522409 |
| C                                 | 0.1129267  | 0.4952786  | -6.5675329 |
| H                                 | 0.5460647  | 0.5989166  | -7.5657829 |
| Ni                                | -3.1414013 | -0.1776414 | -1.8722199 |
| Ni                                | -0.1166803 | 2.7717626  | 2.3129181  |
| Ni                                | 0.4907307  | -3.1078234 | 1.8490741  |
| O                                 | -4.2077333 | -1.3124684 | -3.4110379 |
| O                                 | -1.2175473 | 3.5342526  | 4.0202561  |
| O                                 | 1.8149177  | -4.2871424 | 3.1943391  |
| O                                 | -5.2253083 | -0.7131414 | -1.6152249 |
| O                                 | -0.6320623 | 4.8763516  | 2.4461391  |
| O                                 | 0.9899757  | -5.1261934 | 1.3949251  |
| O                                 | -1.6040403 | 5.6663926  | 4.2258351  |
| O                                 | 2.1940207  | -6.3743654 | 2.7061711  |
| O                                 | -6.3308813 | -1.7344124 | -3.1864189 |
| O                                 | -3.8699273 | 1.4904006  | -2.9695879 |
| O                                 | 1.5855797  | 3.3129366  | 3.4698621  |
| O                                 | -0.9931323 | -3.9058344 | 3.1356351  |
| N                                 | -2.4008033 | -1.8283864 | -0.8852969 |

|   |            |            |            |
|---|------------|------------|------------|
| N | -1.7941153 | 2.2143906  | 1.2520101  |
| N | 1.9561097  | -2.3556604 | 0.6199391  |
| N | 1.6930947  | -1.3207154 | -0.1613719 |
| N | -1.3354643 | -1.6991414 | -0.1097719 |
| N | -1.6920933 | 1.2781396  | 0.3234411  |
| N | 2.7331827  | -0.9850784 | -0.8934879 |
| N | -2.8449643 | 1.0524466  | -0.2697649 |
| N | -1.0225873 | -2.8293294 | 0.4847241  |
| N | 0.1816307  | -0.1794134 | 2.0921011  |
| N | -1.3444113 | 0.1331306  | -2.7505959 |
| N | 0.1952657  | 0.8562456  | 2.9038461  |
| N | 0.3257317  | -1.3118644 | 2.7504971  |
| N | -5.2938963 | -1.2639104 | -2.7580609 |
| N | -1.1606953 | 4.7280976  | 3.5916911  |
| N | 1.6804877  | -5.3030774 | 2.4476491  |
| C | -3.0960893 | 2.6286746  | 1.2813061  |
| C | 3.2555577  | -2.7178864 | 0.4022891  |
| C | -2.8090793 | -3.1301134 | -0.8088479 |
| C | -3.7979663 | 3.5749616  | 2.0652511  |
| C | 4.0920247  | -3.7127764 | 0.9614581  |
| C | -3.8540333 | -3.8564274 | -1.4283489 |
| H | -3.3316873 | 4.1470166  | 2.8625771  |
| H | 3.7689067  | -4.3738974 | 1.7614471  |
| H | -4.5295983 | -3.4169054 | -2.1567279 |
| C | -5.1477243 | 3.7343456  | 1.8019191  |
| C | 5.3874267  | -3.7900784 | 0.4792281  |
| C | -3.9701943 | -5.1960474 | -1.1002279 |
| H | -5.7212973 | 4.4540556  | 2.3916071  |
| H | 6.0626897  | -4.5442354 | 0.8913231  |
| H | -4.7631703 | -5.7887434 | -1.5636579 |
| C | -5.8181643 | 2.9837016  | 0.7951721  |
| C | 5.8758807  | -2.9084034 | -0.5261279 |
| C | -3.0831853 | -5.8323684 | -0.1862349 |
| H | -6.8867843 | 3.1488536  | 0.6358281  |
| H | 6.9101027  | -3.0131934 | -0.8640209 |
| H | -3.2237343 | -6.8938154 | 0.0338961  |
| C | -5.1507733 | 2.0463566  | 0.0285701  |
| C | 5.0786117  | -1.9170264 | -1.0675149 |
| C | -2.0478693 | -5.1422664 | 0.4154661  |
| H | -5.6548273 | 1.4484326  | -0.7299579 |
| H | 5.4493817  | -1.2177604 | -1.8171999 |
| H | -1.3536683 | -5.6143384 | 1.1082661  |
| C | -3.7726103 | 1.8784136  | 0.2885361  |
| C | 3.7529947  | -1.8330204 | -0.5857519 |
| C | -1.9201293 | -3.7740864 | 0.0864021  |
| C | -1.0814513 | 0.2428356  | -4.0833379 |



|   |            |            |            |
|---|------------|------------|------------|
| C | 0.3557097  | 0.3912436  | 4.1763951  |
| C | 0.4505017  | -1.0157054 | 4.0749591  |
| C | -1.9270763 | 0.2888406  | -5.2140639 |
| C | 0.6488557  | -1.8250834 | 5.2150581  |
| C | 0.4334947  | 1.0490516  | 5.4234841  |
| H | -3.0092293 | 0.2302686  | -5.1048529 |
| H | 0.7502287  | -2.9068914 | 5.1326621  |
| H | 0.3543677  | 2.1335796  | 5.4887931  |
| C | -1.3053763 | 0.4152916  | -6.4436729 |
| C | 0.7276587  | -1.1710094 | 6.4324881  |
| C | 0.6165517  | 0.2462046  | 6.5358101  |
| H | -1.9134153 | 0.4570976  | -7.3511789 |
| H | 0.6844307  | 0.7071416  | 7.5246521  |
| H | 0.8844147  | -1.7530694 | 7.3443441  |
| H | 1.8247497  | 4.2546686  | 3.4596691  |
| H | 2.3900707  | 2.8505946  | 3.1805561  |
| H | 4.1856677  | -1.3121364 | -3.7832859 |
| H | 2.7686027  | -1.8874604 | -3.6058049 |
| H | -1.6565853 | -3.2493024 | 3.4066421  |
| H | -0.6692373 | -4.2932534 | 3.9651861  |
| H | -3.4151903 | 2.3209506  | -2.7515549 |
| H | -4.8156843 | 1.6967866  | -2.8887209 |

**Ni<sub>5</sub>T**

|    |            |            |            |
|----|------------|------------|------------|
| Ni | -0.0084909 | 0.0106254  | 0.0096076  |
| Ni | 2.7957891  | -0.2906446 | 2.2968356  |
| O  | 3.5906171  | -1.5702266 | 3.8360276  |
| O  | 4.8813011  | -0.7919316 | 2.3242466  |
| O  | 5.7124471  | -1.9606406 | 3.9388116  |
| O  | 3.3213491  | 1.2708384  | 3.6335586  |
| N  | 2.2519431  | -1.8596496 | 1.0603306  |
| N  | 1.3157621  | -1.6694706 | 0.1526926  |
| N  | 1.0970591  | -2.7507016 | -0.5561884 |
| N  | -0.1501439 | -0.0509436 | 2.1324966  |
| N  | 0.8868771  | -0.1058836 | 2.9348936  |
| N  | 4.7631251  | -1.4534986 | 3.3911976  |
| C  | 2.6731571  | -3.1510246 | 0.9504906  |
| C  | 3.6255881  | -3.9223676 | 1.6520766  |
| H  | 4.2068011  | -3.5365976 | 2.4886166  |
| C  | 3.7871341  | -5.2322946 | 1.2564586  |
| H  | 4.5137961  | -5.8591086 | 1.7814926  |
| C  | 3.0325151  | -5.8011716 | 0.1983866  |
| H  | 3.1989531  | -6.8498336 | -0.0649154 |
| C  | 2.0927901  | -5.0683076 | -0.4907054 |
| H  | 1.4916401  | -5.5037416 | -1.2926674 |
| C  | 1.9250301  | -3.7246486 | -0.0984794 |
| C  | 0.4246661  | -0.1332596 | 4.2127776  |
| C  | 1.0824771  | -0.2013526 | 5.4578356  |
| H  | 2.1711101  | -0.2478376 | 5.5241436  |
| C  | 0.2804271  | -0.2063476 | 6.5779746  |
| H  | 0.7433091  | -0.2592896 | 7.5678756  |
| Ni | -3.0834999 | 0.2007994  | 1.9307416  |
| Ni | -0.1135679 | -2.8757366 | -2.1822564 |
| Ni | 0.3691881  | 3.0077884  | -1.9996034 |
| O  | -4.0747659 | 1.3952794  | 3.4224896  |
| O  | -1.2439119 | -3.7230966 | -3.8054184 |
| O  | 1.6675411  | 4.0089194  | -3.3882324 |
| O  | -5.1619829 | 0.7105854  | 1.7174406  |
| O  | -0.6323959 | -4.9594776 | -2.1757574 |
| O  | 0.8649311  | 5.0875674  | -1.7298074 |
| O  | -1.6612409 | -5.8413576 | -3.8573954 |
| O  | 2.0615551  | 6.1241614  | -3.1982474 |
| O  | -6.1922959 | 1.7928394  | 3.2769536  |
| O  | -3.7832429 | -1.4254146 | 3.0977966  |
| O  | 1.5615931  | -3.4629666 | -3.3401864 |
| O  | -1.1680009 | 3.7050314  | -3.2814524 |
| N  | -2.3800809 | 1.8300564  | 0.8653316  |
| N  | -1.7900049 | -2.2785006 | -1.1270604 |
| N  | 1.8905311  | 2.3502444  | -0.7591054 |

|   |            |            |            |
|---|------------|------------|------------|
| N | 1.6695041  | 1.3451344  | 0.0618786  |
| N | -1.3498609 | 1.6802634  | 0.0575266  |
| N | -1.6764149 | -1.3135026 | -0.2385934 |
| N | 2.7269781  | 1.0656364  | 0.7868896  |
| N | -2.8134939 | -1.0740706 | 0.3706966  |
| N | -1.0697969 | 2.7877294  | -0.5863544 |
| N | 0.1374611  | 0.0681884  | -2.1152104 |
| N | -1.2789359 | -0.0382406 | 2.8011326  |
| N | 0.1518091  | -0.9992686 | -2.8769804 |
| N | 0.2445801  | 1.1682874  | -2.8202464 |
| N | -5.1811489 | 1.3102584  | 2.8262366  |
| N | -1.1886129 | -4.8774786 | -3.3042294 |
| N | 1.5414261  | 5.1136944  | -2.7898904 |
| C | -3.0845259 | -2.7033426 | -1.1093644 |
| C | 3.1775661  | 2.7569284  | -0.5743854 |
| C | -2.8029319 | 3.1205284  | 0.7553016  |
| C | -3.7936509 | -3.6823706 | -1.8392044 |
| C | 3.9712341  | 3.7584604  | -1.1753994 |
| C | -3.8299239 | 3.8574564  | 1.3851696  |
| H | -3.3411559 | -4.2903536 | -2.6217564 |
| H | 3.6144141  | 4.3976464  | -1.9829074 |
| H | -4.4800629 | 3.4368314  | 2.1515226  |
| C | -5.1311559 | -3.8379076 | -1.5464634 |
| C | 5.2666181  | 3.8870154  | -0.7233504 |
| C | -3.9695719 | 5.1780234  | 1.0183816  |
| H | -5.7102759 | -4.5863956 | -2.0950834 |
| H | 5.9111061  | 4.6501664  | -1.1692904 |
| H | -4.7521419 | 5.7799364  | 1.4895366  |
| C | -5.7867739 | -3.0507496 | -0.5652004 |
| C | 5.7991691  | 3.0510354  | 0.2918576  |
| C | -3.1230999 | 5.7879994  | 0.0566876  |
| H | -6.8530799 | -3.2129996 | -0.3828384 |
| H | 6.8380741  | 3.1941224  | 0.6030576  |
| H | -3.2807499 | 6.8414104  | -0.1928564 |
| C | -5.1150559 | -2.0837286 | 0.1483516  |
| C | 5.0449981  | 2.0598824  | 0.8789906  |
| C | -2.1081809 | 5.0898294  | -0.5576864 |
| H | -5.6191819 | -1.4570276 | 0.8873786  |
| H | 5.4565511  | 1.3958924  | 1.6428666  |
| H | -1.4462469 | 5.5531994  | -1.2915784 |
| C | -3.7441259 | -1.9227146 | -0.1371004 |
| C | 3.7154531  | 1.9257274  | 0.4302646  |
| C | -1.9571849 | 3.7371484  | -0.1902724 |
| C | -0.9809659 | -0.0840916 | 4.1262806  |
| C | 0.2701211  | -0.5893116 | -4.1673254 |
| C | 0.3368141  | 0.8180164  | -4.1296244 |

|   |            |            |            |
|---|------------|------------|------------|
| C | -1.7912629 | -0.0817926 | 5.2801306  |
| C | 0.4824381  | 1.5806694  | -5.3062344 |
| C | 0.3246331  | -1.2952736 | -5.3863494 |
| H | -2.8801279 | -0.0316346 | 5.2081516  |
| H | 0.5604321  | 2.6701254  | -5.2723464 |
| H | 0.2662391  | -2.3851806 | -5.4161164 |
| C | -1.1365029 | -0.1430606 | 6.4910296  |
| C | 0.5389701  | 0.8793454  | -6.4913194 |
| C | 0.4559791  | -0.5384266 | -6.5303064 |
| H | -1.7197859 | -0.1438666 | 7.4166956  |
| H | 0.5033571  | -1.0399936 | -7.5015274 |
| H | 0.6540651  | 1.4248344  | -7.4326804 |
| H | 1.7841971  | -4.4064306 | -3.3718454 |
| H | 2.3863521  | -3.0213586 | -3.0832754 |
| H | 4.2586631  | 1.5162564  | 3.6801486  |
| H | 2.8579851  | 2.1023914  | 3.4452856  |
| H | -1.8412709 | 3.0328154  | -3.4720344 |
| H | -0.9127009 | 4.0543444  | -4.1491914 |
| H | -3.3115319 | -2.2554846 | 2.9247246  |
| H | -4.7230769 | -1.6585846 | 3.0381436  |

**Ni<sub>5</sub><sup>-</sup>**

|    |            |            |            |
|----|------------|------------|------------|
| Ni | 0.0094906  | -0.0480790 | 0.0406497  |
| Ni | 0.1406086  | -2.0018860 | 3.0282017  |
| O  | -0.7971064 | -2.3956670 | 4.8737787  |
| O  | -0.0618144 | -3.9804620 | 3.6575517  |
| O  | -0.9362884 | -4.4350490 | 5.5815857  |
| N  | -1.5301774 | -1.9689080 | 1.9046517  |
| N  | -1.5266334 | -1.3350900 | 0.7504317  |
| N  | -2.6888044 | -1.4025560 | 0.1542797  |
| N  | 0.1497996  | 0.7027910  | 2.0402447  |
| N  | 0.2503346  | -0.0530510 | 3.1097027  |
| N  | -0.6049954 | -3.6370760 | 4.7441677  |
| C  | -2.7786884 | -2.4858380 | 2.0887057  |
| C  | -3.3789294 | -3.2318480 | 3.1259277  |
| H  | -2.8572044 | -3.5138090 | 4.0395037  |
| C  | -4.7005734 | -3.5840520 | 2.9604947  |
| H  | -5.1980714 | -4.1588210 | 3.7469577  |
| C  | -5.4433754 | -3.2155970 | 1.8096547  |
| H  | -6.4920854 | -3.5181070 | 1.7387757  |
| C  | -4.8783094 | -2.4799660 | 0.7926107  |
| H  | -5.4493574 | -2.1777140 | -0.0880603 |
| C  | -3.5252854 | -2.1188980 | 0.9494517  |
| C  | 0.3640776  | 0.7528650  | 4.1959747  |
| C  | 0.5127856  | 0.4758540  | 5.5681387  |
| H  | 0.5353956  | -0.5524460 | 5.9387407  |
| C  | 0.6166606  | 1.5676820  | 6.4027607  |
| H  | 0.7336196  | 1.4112080  | 7.4790497  |
| Ni | 0.1901896  | 3.4523670  | 0.9819807  |
| Ni | -3.0923854 | -0.7022870 | -1.7136993 |
| Ni | 2.7974306  | -0.9071540 | -2.1014573 |
| O  | 1.4501146  | 4.9134850  | 1.9429137  |
| O  | -4.1888494 | -0.1143300 | -3.4596243 |
| O  | 3.7047306  | -2.5546420 | -3.1247323 |
| O  | 0.5107246  | 5.3724860  | 0.0818727  |
| O  | -5.1983104 | -0.2847220 | -1.5863703 |
| O  | 4.9253096  | -1.2086050 | -2.0034223 |
| O  | -6.3249874 | 0.1929290  | -3.3665113 |
| O  | 5.8522486  | -2.7861920 | -3.1504233 |
| O  | 1.6695876  | 6.8878590  | 1.0946987  |
| O  | -1.3478924 | 4.3849980  | 2.1042147  |
| O  | -3.6867694 | -2.6552420 | -2.2665023 |
| O  | 3.2048366  | 0.1698140  | -3.8797723 |
| N  | 1.7396436  | 2.5231160  | -0.0313863 |
| N  | -2.5047604 | 1.2285630  | -1.2539393 |
| N  | 2.4530136  | -1.9440060 | -0.3320673 |
| N  | 1.4720986  | -1.5592380 | 0.4541107  |

|   |            |            |            |
|---|------------|------------|------------|
| N | 1.5719546  | 1.3037280  | -0.4990063 |
| N | -1.4455674 | 1.4162200  | -0.4949943 |
| N | 1.4192706  | -2.2835040 | 1.5479887  |
| N | -1.2338864 | 2.6873990  | -0.2542033 |
| N | 2.6096876  | 0.8980740  | -1.1906023 |
| N | -0.1497174 | -0.8397980 | -1.9222413 |
| N | 0.1838886  | 1.9723020  | 2.3549277  |
| N | -1.2863394 | -1.0927160 | -2.5248563 |
| N | 0.8780056  | -1.1464230 | -2.6764223 |
| N | 1.2200146  | 5.7685440  | 1.0459807  |
| N | -5.2773314 | -0.0675340 | -2.8255053 |
| N | 4.8649066  | -2.1985760 | -2.7782193 |
| C | -3.0230314 | 2.4551410  | -1.5441743 |
| C | 3.0881076  | -2.9861520 | 0.2769717  |
| C | 2.9720536  | 2.9476120  | -0.4262783 |
| C | -4.1198694 | 2.8847940  | -2.3225853 |
| C | 4.1893916  | -3.7942990 | -0.0804413 |
| C | 3.7036486  | 4.1334460  | -0.1983533 |
| H | -4.7547974 | 2.2027000  | -2.8866203 |
| H | 4.7272136  | -3.6935840 | -1.0224673 |
| H | 3.3371716  | 4.9443080  | 0.4304567  |
| C | -4.3524954 | 4.2414240  | -2.3854473 |
| C | 4.5794896  | -4.7594940 | 0.8223237  |
| C | 4.9529046  | 4.2202890  | -0.7729193 |
| H | -5.1921854 | 4.6075190  | -2.9833033 |
| H | 5.4298236  | -5.4020200 | 0.5763397  |
| H | 5.5492956  | 5.1232310  | -0.6128843 |
| C | -3.5299514 | 5.1816900  | -1.7129833 |
| C | 3.9170276  | -4.9472670 | 2.0627017  |
| C | 5.4979946  | 3.1693540  | -1.5554153 |
| H | -3.7604434 | 6.2470940  | -1.8041943 |
| H | 4.2791606  | -5.7230750 | 2.7434437  |
| H | 6.4953316  | 3.2948830  | -1.9873983 |
| C | -2.4455774 | 4.7834440  | -0.9641433 |
| C | 2.8339936  | -4.1783750 | 2.4238397  |
| C | 4.8086736  | 1.9976340  | -1.7712253 |
| H | -1.7920164 | 5.5003280  | -0.4618683 |
| H | 2.3118886  | -4.3178800 | 3.3731467  |
| H | 5.2269196  | 1.1804680  | -2.3615923 |
| C | -2.2018854 | 3.3971290  | -0.8894673 |
| C | 2.4231276  | -3.1965900 | 1.5020757  |
| C | 3.5292276  | 1.8981970  | -1.1870953 |
| C | 0.3218866  | 2.0718440  | 3.7039007  |
| C | -1.0039554 | -1.5923940 | -3.7568373 |
| C | 0.4017036  | -1.6344370 | -3.8521403 |
| C | 0.4323226  | 3.1802700  | 4.5671857  |

|   |            |            |            |
|---|------------|------------|------------|
| C | 1.0465556  | -2.1218210 | -5.0074913 |
| C | -1.8268744 | -2.0100830 | -4.8228223 |
| H | 0.4092476  | 4.2023030  | 4.1815037  |
| H | 2.1357866  | -2.1797310 | -5.0720713 |
| H | -2.9159754 | -1.9626660 | -4.7540973 |
| C | 0.5781746  | 2.9000000  | 5.9087437  |
| C | 0.2320356  | -2.5346280 | -6.0394793 |
| C | -1.1846324 | -2.4730400 | -5.9505263 |
| H | 0.6699726  | 3.7244810  | 6.6218277  |
| H | -1.7791824 | -2.8064600 | -6.8062893 |
| H | 0.6840116  | -2.9237310 | -6.9566753 |
| H | -4.6202734 | -2.8997740 | -2.1699553 |
| H | -3.1962114 | -3.3674470 | -1.8270643 |
| H | 2.4450396  | 0.6903240  | -4.1854943 |
| H | 3.4867736  | -0.3352930 | -4.6581853 |
| H | -2.1761724 | 3.8796780  | 2.1172227  |
| H | -1.6134574 | 5.2876100  | 1.8679627  |
| H | 1.3471036  | -1.9493520 | 3.8036757  |

**\*COO-**

|    |            |            |            |
|----|------------|------------|------------|
| Ni | -0.0292913 | -0.0180089 | -0.0147047 |
| Ni | -3.0936053 | -1.6267429 | -1.0346177 |
| O  | -3.8116813 | -3.1225219 | -2.3864227 |
| O  | -4.3193073 | -3.2496229 | -0.3175417 |
| O  | -5.1565263 | -4.6704079 | -1.7101367 |
| N  | -1.2769623 | -2.7606759 | -0.6407547 |
| N  | -0.2483873 | -2.1319689 | -0.1234137 |
| N  | 0.7754737  | -2.9338539 | 0.0830893  |
| N  | -0.9088493 | 0.0815901  | -1.9572197 |
| N  | -2.0396623 | -0.4873339 | -2.2962637 |
| N  | -4.4589853 | -3.7056969 | -1.4783247 |
| C  | -0.9139013 | -4.0631979 | -0.7988507 |
| C  | -1.5826623 | -5.1899219 | -1.3281047 |
| H  | -2.5903263 | -5.1383769 | -1.7440877 |
| C  | -0.8925093 | -6.3831589 | -1.3364537 |
| H  | -1.3774863 | -7.2758709 | -1.7425407 |
| C  | 0.4358347  | -6.4898649 | -0.8480177 |
| H  | 0.9363657  | -7.4619949 | -0.8870957 |
| C  | 1.1095417  | -5.3998989 | -0.3426877 |
| H  | 2.1407127  | -5.4718099 | 0.0126783  |
| C  | 0.4106807  | -4.1753709 | -0.3246707 |
| C  | -2.2721163 | -0.2022729 | -3.6038717 |
| C  | -3.3302023 | -0.5409979 | -4.4714077 |
| H  | -4.1674193 | -1.1628679 | -4.1431437 |
| C  | -3.2533673 | -0.0543339 | -5.7586777 |
| H  | -4.0512793 | -0.2886689 | -6.4694307 |
| Ni | 1.2567417  | 1.9095761  | -2.8073217 |
| Ni | 2.4839877  | -2.4313419 | 1.0364983  |
| Ni | -0.7330053 | 2.2080801  | 2.7678203  |
| O  | 0.7466307  | 3.5039391  | -4.1714897 |
| O  | 4.4830357  | -2.5554709 | 1.8172723  |
| O  | -1.4701053 | 2.2900841  | 4.7848513  |
| O  | 2.6589927  | 3.4818751  | -3.2229927 |
| O  | 3.8823277  | -3.8669479 | 0.2437893  |
| O  | -2.2080693 | 3.6723391  | 3.3344073  |
| O  | 5.8468727  | -4.0766329 | 1.1167763  |
| O  | -2.8688833 | 3.8227551  | 5.3844523  |
| O  | 2.2097877  | 5.0060291  | -4.6858497 |
| O  | 2.0247867  | 0.9844561  | -4.5571327 |
| O  | 2.0698997  | -3.9223779 | 2.4890493  |
| O  | 0.7039677  | 3.5912851  | 3.4977333  |
| N  | 0.4533327  | 2.8450021  | -1.1469557 |
| N  | 2.9419887  | -0.9442119 | -0.3284407 |
| N  | -2.1439183 | 0.8602101  | 2.0951453  |
| N  | -1.9249743 | 0.1847631  | 0.9809353  |



|   |            |            |            |
|---|------------|------------|------------|
| N | 0.1559037  | 2.1211931  | -0.0875627 |
| N | 1.9703727  | -0.1950869 | -0.8071667 |
| N | -2.9394493 | -0.5844559 | 0.6701283  |
| N | 2.4119037  | 0.6706051  | -1.6889407 |
| N | -0.2585823 | 2.8660191  | 0.9103813  |
| N | 0.8668347  | -0.1249749 | 1.9262943  |
| N | -0.3694003 | 0.7318661  | -2.9657687 |
| N | 1.7093077  | -1.0588299 | 2.2970183  |
| N | 0.6128827  | 0.7113301  | 2.9050203  |
| N | 1.8849137  | 4.0277481  | -4.0558727 |
| N | 4.7730907  | -3.5250699 | 1.0669903  |
| N | -2.2010003 | 3.2885031  | 4.5315243  |
| C | 4.1005957  | -0.5450059 | -0.9235557 |
| C | -3.3752553 | 0.5042621  | 2.5538343  |
| C | 0.2088267  | 4.1487471  | -0.8367437 |
| C | 5.4454217  | -0.9549849 | -0.7921987 |
| C | -4.1274033 | 0.8666931  | 3.6930453  |
| C | 0.3135387  | 5.3525511  | -1.5685937 |
| H | 5.7681967  | -1.7259899 | -0.0930947 |
| H | -3.7542603 | 1.5403021  | 4.4644053  |
| H | 0.6133767  | 5.3886551  | -2.6160077 |
| C | 6.3785767  | -0.3073989 | -1.5722217 |
| C | -5.3759033 | 0.2986161  | 3.8280053  |
| C | -0.0232823 | 6.5162801  | -0.9123507 |
| H | 7.4304647  | -0.5971569 | -1.4932377 |
| H | -5.9839843 | 0.5558681  | 4.7005023  |
| H | 0.0411597  | 7.4668061  | -1.4501947 |
| C | 6.0221557  | 0.7354461  | -2.4653077 |
| C | -5.8968083 | -0.6169869 | 2.8781733  |
| C | -0.4619073 | 6.5221691  | 0.4369583  |
| H | 6.8078067  | 1.2204181  | -3.0519867 |
| H | -6.8952663 | -1.0348689 | 3.0375933  |
| H | -0.7144793 | 7.4776371  | 0.9062883  |
| C | 4.7184957  | 1.1590131  | -2.5963977 |
| C | -5.1708643 | -0.9963309 | 1.7709813  |
| C | -0.5841093 | 5.3581971  | 1.1615393  |
| H | 4.4441217  | 1.9811411  | -3.2613227 |
| H | -5.5578073 | -1.7137979 | 1.0430933  |
| H | -0.9267833 | 5.3541141  | 2.1978113  |
| C | 3.7539637  | 0.4974301  | -1.8086427 |
| C | -3.8913213 | -0.4226839 | 1.6250703  |
| C | -0.2433613 | 4.1607441  | 0.4993263  |
| C | -1.1910263 | 0.5904461  | -4.0380787 |
| C | 2.0378987  | -0.8354529 | 3.5967093  |
| C | 1.3214457  | 0.3110341  | 3.9927693  |
| C | -1.1228373 | 1.0835881  | -5.3571857 |

|   |            |            |            |
|---|------------|------------|------------|
| C | 1.4143767  | 0.8194451  | 5.3041503  |
| C | 2.8931127  | -1.5145609 | 4.4879953  |
| H | -0.2874383 | 1.7035201  | -5.6902397 |
| H | 0.8362897  | 1.6920591  | 5.6180453  |
| H | 3.4508257  | -2.4001039 | 4.1745143  |
| C | -2.1648083 | 0.7479071  | -6.1943727 |
| C | 2.2504707  | 0.1458661  | 6.1684173  |
| C | 2.9830457  | -1.0025169 | 5.7643883  |
| H | -2.1595193 | 1.1081871  | -7.2275137 |
| H | 3.6337867  | -1.4931039 | 6.4942763  |
| H | 2.3539697  | 0.4992061  | 7.1986483  |
| H | 2.2972577  | -4.8368159 | 2.2587823  |
| H | 1.1307747  | -3.9571459 | 2.7310763  |
| H | 1.6028407  | 3.4051921  | 3.1834303  |
| H | 0.7891757  | 3.6627671  | 4.4610483  |
| H | 2.1170257  | 0.0215921  | -4.4828117 |
| H | 2.8773137  | 1.2903501  | -4.9034437 |
| C | -4.8593563 | -0.4012509 | -1.4720567 |
| O | -4.5533153 | 0.7613191  | -1.4387207 |
| O | -5.7794673 | -1.1598249 | -1.6525217 |

\*OCO-

|    |            |            |            |
|----|------------|------------|------------|
| Ni | -0.0129292 | 0.0301146  | -0.0115112 |
| Ni | 3.2859728  | -1.4677524 | 0.4310638  |
| O  | 4.2825448  | -3.2046434 | 1.2423088  |
| O  | 4.6506868  | -2.6162814 | -0.7770362 |
| O  | 5.8196818  | -4.2030244 | 0.1025628  |
| N  | 1.6374058  | -2.5926614 | -0.2455792 |
| N  | 0.5154978  | -1.9758804 | -0.5500532 |
| N  | -0.3946462 | -2.8085814 | -0.9999432 |
| N  | 0.9523038  | -0.3207364 | 1.8539268  |
| N  | 2.1537218  | -0.8295764 | 1.9809388  |
| N  | 4.9518428  | -3.3652314 | 0.1871508  |
| C  | 1.4537408  | -3.9198964 | -0.4953222 |
| C  | 2.2752328  | -5.0576354 | -0.3306412 |
| H  | 3.2756698  | -5.0082534 | 0.0995498  |
| C  | 1.7438088  | -6.2749954 | -0.6973112 |
| H  | 2.3518598  | -7.1765934 | -0.5790312 |
| C  | 0.4259608  | -6.4019184 | -1.2068592 |
| H  | 0.0556208  | -7.3963124 | -1.4729022 |
| C  | -0.3976882 | -5.3081944 | -1.3546552 |
| H  | -1.4257722 | -5.4034664 | -1.7126742 |
| C  | 0.1403628  | -4.0565534 | -0.9911812 |
| C  | 2.4504938  | -0.8755884 | 3.3049068  |
| C  | 3.5860928  | -1.3329894 | 4.0049548  |
| H  | 4.4477138  | -1.7561794 | 3.4826538  |
| C  | 3.5473858  | -1.2231194 | 5.3778388  |
| H  | 4.4040728  | -1.5629964 | 5.9674918  |
| Ni | -1.3714242 | 0.8508306  | 3.2474398  |
| Ni | -2.2141262 | -2.3066274 | -1.6857232 |
| Ni | 0.2867668  | 3.0416346  | -2.0179632 |
| O  | -0.9898112 | 2.0613396  | 4.9886478  |
| O  | -4.2244302 | -2.4447804 | -2.3919992 |
| O  | 0.9475378  | 3.7992726  | -3.9170592 |
| O  | -2.9578032 | 1.9690296  | 4.1657198  |
| O  | -3.3686072 | -4.1388774 | -1.4142812 |
| O  | 1.5066538  | 4.8114906  | -2.1229542 |
| O  | -5.3546982 | -4.2782374 | -2.2492072 |
| O  | 2.0736568  | 5.6383446  | -4.0362452 |
| O  | -2.6110902 | 3.0877926  | 5.9805128  |
| O  | -1.8221492 | -0.6498714 | 4.6862698  |
| O  | -1.7143172 | -3.1442854 | -3.5689802 |
| O  | -1.3559522 | 4.3575066  | -2.3111182 |
| N  | -0.8697762 | 2.3387466  | 1.9005008  |
| N  | -2.7544612 | -1.4694734 | 0.1084358  |
| N  | 1.8912908  | 1.7658196  | -1.7644512 |
| N  | 1.7829788  | 0.7574366  | -0.9209222 |

|   |            |            |            |
|---|------------|------------|------------|
| N | -0.4840392 | 2.0031156  | 0.6869898  |
| N | -1.8987182 | -0.6877124 | 0.7349028  |
| N | 2.8917528  | 0.0635336  | -0.8444382 |
| N | -2.3925952 | -0.2272464 | 1.8586048  |
| N | -0.2106502 | 3.0554286  | -0.0473982 |
| N | -0.9805222 | 0.3787356  | -1.8779282 |
| N | 0.4276788  | -0.0219274 | 3.0196698  |
| N | -1.7549242 | -0.4955494 | -2.4730682 |
| N | -0.8743092 | 1.4862396  | -2.5742922 |
| N | -2.2014532 | 2.3915346  | 5.0822648  |
| N | -4.3465122 | -3.6469144 | -2.0331982 |
| N | 1.5238248  | 4.7859756  | -3.3806032 |
| C | -3.8875702 | -1.5293684 | 0.8637048  |
| C | 3.1482248  | 1.7268206  | -2.2878492 |
| C | -0.8394272 | 3.6987456  | 1.9794228  |
| C | -5.1216882 | -2.1985844 | 0.7092978  |
| C | 3.8213718  | 2.5112046  | -3.2506012 |
| C | -1.1239142 | 4.6142026  | 3.0167978  |
| H | -5.3621072 | -2.8295794 | -0.1456462 |
| H | 3.3498668  | 3.3352066  | -3.7849052 |
| H | -1.4285692 | 4.3111706  | 4.0175548  |
| C | -6.0591772 | -2.0239764 | 1.7039628  |
| C | 5.1255438  | 2.1710916  | -3.5368842 |
| C | -0.9757222 | 5.9535836  | 2.7308508  |
| H | -7.0261692 | -2.5276214 | 1.6149748  |
| H | 5.6750028  | 2.7555756  | -4.2808322 |
| H | -1.1823052 | 6.6893816  | 3.5134928  |
| C | -5.8149602 | -1.2073304 | 2.8378188  |
| C | 5.7786278  | 1.0804186  | -2.9066612 |
| C | -0.5527432 | 6.4110376  | 1.4564838  |
| H | -6.6002082 | -1.1006884 | 3.5919388  |
| H | 6.8165188  | 0.8598306  | -3.1731662 |
| H | -0.4488162 | 7.4871736  | 1.2895188  |
| C | -4.6189532 | -0.5461554 | 3.0047758  |
| C | 5.1345378  | 0.2937226  | -1.9785502 |
| C | -0.2650332 | 5.5348936  | 0.4344218  |
| H | -4.4282772 | 0.0942586  | 3.8689388  |
| H | 5.6247158  | -0.5577964 | -1.4994042 |
| H | 0.0717678  | 5.8800406  | -0.5451352 |
| C | -3.6499082 | -0.7228394 | 1.9964428  |
| C | 3.7976988  | 0.6308896  | -1.6810992 |
| C | -0.4149702 | 4.1610406  | 0.7159498  |
| C | 1.3324908  | -0.3461534 | 3.9805188  |
| C | -2.1962502 | 0.0586566  | -3.6333892 |
| C | -1.6177442 | 1.3419716  | -3.7017422 |
| C | 1.3084258  | -0.2310164 | 5.3858298  |

|   |            |            |            |
|---|------------|------------|------------|
| C | -1.8509432 | 2.1983416  | -4.7968042 |
| C | -3.0524592 | -0.4153494 | -4.6483132 |
| H | 0.4467388  | 0.1944216  | 5.9055738  |
| H | -1.3849722 | 3.1842916  | -4.8590632 |
| H | -3.5111992 | -1.4043864 | -4.5886452 |
| C | 2.4265768  | -0.6746484 | 6.0581648  |
| C | -2.6837622 | 1.7213366  | -5.7856592 |
| C | -3.2805082 | 0.4343076  | -5.7091172 |
| H | 2.4580178  | -0.6058624 | 7.1496068  |
| H | -3.9387812 | 0.1123906  | -6.5215462 |
| H | -2.8955922 | 2.3475976  | -6.6573552 |
| H | -1.8160072 | -4.1041354 | -3.6667752 |
| H | -0.7921982 | -2.9693074 | -3.8157042 |
| H | -2.2129542 | 3.9326146  | -2.1490992 |
| H | -1.4541732 | 4.7871096  | -3.1748242 |
| H | -1.9036002 | -1.5440094 | 4.3186338  |
| H | -2.6144402 | -0.5362484 | 5.2341508  |
| C | 6.0148798  | -0.7819394 | 1.1856758  |
| O | 7.0729998  | -0.3407464 | 1.5944558  |
| O | 4.8456888  | -0.3389414 | 1.1810408  |

\*CO<sub>2</sub><sup>-</sup>

|    |            |            |            |
|----|------------|------------|------------|
| Ni | 0.1115904  | 0.0799518  | 0.0258515  |
| Ni | -2.5552176 | 1.6945828  | 1.8741525  |
| O  | -2.9075436 | 2.2371038  | 3.7170265  |
| O  | -3.3465016 | 3.4645608  | 2.0542675  |
| O  | -3.7843986 | 4.1952698  | 4.0517175  |
| N  | -0.3596156 | 2.4053938  | 1.9082755  |
| N  | 0.5195764  | 1.7818258  | 1.1664565  |
| N  | 1.7447994  | 2.2394878  | 1.3408115  |
| N  | -1.0340246 | -0.6945072 | 1.6211935  |
| N  | -2.0437806 | -0.0798442 | 2.1954665  |
| N  | -3.3773376 | 3.3481148  | 3.3196625  |
| C  | 0.3162064  | 3.3384198  | 2.6261935  |
| C  | -0.1104916 | 4.2875868  | 3.5788155  |
| H  | -1.1567806 | 4.3838918  | 3.8786975  |
| C  | 0.8570644  | 5.0987268  | 4.1303885  |
| H  | 0.5694314  | 5.8478138  | 4.8738485  |
| C  | 2.2251704  | 4.9873728  | 3.7648135  |
| H  | 2.9519354  | 5.6533788  | 4.2395425  |
| C  | 2.6590914  | 4.0650398  | 2.8371035  |
| H  | 3.7141214  | 3.9715838  | 2.5677395  |
| C  | 1.6756164  | 3.2332478  | 2.2630105  |
| C  | -2.5660486 | -0.9033752 | 3.1447575  |
| C  | -3.6339906 | -0.7566302 | 4.0510905  |
| H  | -4.2088806 | 0.1702218  | 4.1106705  |
| C  | -3.8961906 | -1.8333432 | 4.8696335  |
| H  | -4.7143896 | -1.7684772 | 5.5926475  |
| Ni | 0.4321124  | -3.2626402 | 1.3812025  |
| Ni | 3.3431124  | 1.7398248  | 0.2079545  |
| Ni | -0.9896616 | -0.0478702 | -3.4253585 |
| O  | -0.7349706 | -5.0408072 | 1.6987275  |
| O  | 5.3948264  | 1.6109528  | -0.4427335 |
| O  | -1.5553876 | 1.1820378  | -5.0846135 |
| O  | 1.2511024  | -5.1970292 | 0.9326975  |
| O  | 4.9446694  | 2.1028098  | 1.5856575  |
| O  | -2.7110706 | -0.5507142 | -4.6174605 |
| O  | 7.0007604  | 2.0745178  | 0.9254765  |
| O  | -3.1926116 | 0.6111738  | -6.3733505 |
| O  | 0.1320104  | -6.9913582 | 1.3732645  |
| O  | 1.0965854  | -3.6071002 | 3.3639375  |
| O  | 3.5499784  | 3.7906488  | -0.3143265 |
| O  | 0.0992124  | -1.1606062 | -4.8650145 |
| N  | -0.3245526 | -2.9341592 | -0.5192955 |
| N  | 3.1818064  | -0.2698922 | 0.6555965  |
| N  | -2.1180786 | 0.9872328  | -2.0248075 |
| N  | -1.7745086 | 0.9182998  | -0.7605575 |

|   |            |            |            |
|---|------------|------------|------------|
| N | -0.3303086 | -1.7161272 | -1.0203085 |
| N | 1.9830164  | -0.8095402 | 0.7181625  |
| N | -2.6673736 | 1.5033568  | 0.0059325  |
| N | 2.0356074  | -2.0700992 | 1.0746015  |
| N | -0.8390836 | -1.6861512 | -2.2288195 |
| N | 1.1571494  | 0.8835668  | -1.6087365 |
| N | -0.8570956 | -1.8865152 | 2.1293005  |
| N | 2.3242974  | 1.4787168  | -1.5236305 |
| N | 0.7137794  | 0.8599808  | -2.8427065 |
| N | 0.2160034  | -5.7868502 | 1.3442865  |
| N | 5.8225904  | 1.9418008  | 0.6950035  |
| N | -2.5079266 | 0.4150528  | -5.3984255 |
| C | 4.0867114  | -1.2346542 | 0.9845235  |
| C | -3.2984816 | 1.6666718  | -2.1047235 |
| C | -0.8700086 | -3.7633492 | -1.4531255 |
| C | 5.4959264  | -1.2506792 | 1.0709825  |
| C | -4.1147236 | 2.0578578  | -3.1876035 |
| C | -1.1380986 | -5.1501492 | -1.4773855 |
| H | 6.1195344  | -0.3900892 | 0.8294955  |
| H | -3.8627916 | 1.8624848  | -4.2290895 |
| H | -0.9300906 | -5.8153522 | -0.6402055 |
| C | 6.0880854  | -2.4352462 | 1.4520925  |
| C | -5.2688656 | 2.7477838  | -2.8879635 |
| C | -1.7133116 | -5.6578922 | -2.6213845 |
| H | 7.1783184  | -2.4838212 | 1.5259795  |
| H | -5.9226276 | 3.0687598  | -3.7038625 |
| H | -1.9369996 | -6.7274312 | -2.6722665 |
| C | 5.3305754  | -3.5988912 | 1.7416565  |
| C | -5.6320986 | 3.0651438  | -1.5549575 |
| C | -2.0327916 | -4.8382632 | -3.7344665 |
| H | 5.8568174  | -4.5119402 | 2.0352765  |
| H | -6.5590186 | 3.6173708  | -1.3757765 |
| H | -2.4914496 | -5.2983302 | -4.6147085 |
| C | 3.9566024  | -3.6062852 | 1.6493815  |
| C | -4.8408456 | 2.7063298  | -0.4864405 |
| C | -1.7867526 | -3.4841222 | -3.7270135 |
| H | 3.3695754  | -4.5040702 | 1.8549325  |
| H | -5.1067506 | 2.9698708  | 0.5396755  |
| H | -2.0385116 | -2.8446532 | -4.5748925 |
| C | 3.3403914  | -2.3987842 | 1.2633185  |
| C | -3.6597706 | 1.9989728  | -0.7837835 |
| C | -1.1971646 | -2.9538532 | -2.5610765 |
| C | -1.7972016 | -2.0813352 | 3.0935005  |
| C | 2.6833404  | 1.8693168  | -2.7745765 |
| C | 1.6344514  | 1.4769008  | -3.6288945 |
| C | -2.0796626 | -3.1781912 | 3.9326625  |

|   |            |            |            |
|---|------------|------------|------------|
| C | 1.6687354  | 1.7521748  | -5.0113865 |
| C | 3.8289404  | 2.5254808  | -3.2694135 |
| H | -1.4933046 | -4.0972282 | 3.8826115  |
| H | 0.8401404  | 1.4796328  | -5.6695275 |
| H | 4.6481094  | 2.8153448  | -2.6084725 |
| C | -3.1332796 | -3.0294142 | 4.8074305  |
| C | 2.7893484  | 2.4014028  | -5.4817925 |
| C | 3.8584274  | 2.7754988  | -4.6239585 |
| H | -3.3934046 | -3.8535962 | 5.4777765  |
| H | 4.7263504  | 3.2810248  | -5.0575925 |
| H | 2.8623764  | 2.6399778  | -6.5469335 |
| H | 4.0872904  | 4.3430038  | 0.2751815  |
| H | 2.6983684  | 4.2522028  | -0.3734875 |
| H | 1.0018174  | -1.3830022 | -4.5870215 |
| H | 0.2005424  | -0.7850052 | -5.7534215 |
| H | 1.5251804  | -2.8343952 | 3.7650455  |
| H | 1.7188614  | -4.3364332 | 3.5124295  |
| C | -5.6753206 | 0.5394478  | 1.7461155  |
| O | -5.5384876 | -0.2934192 | 0.9534205  |
| O | -5.8084006 | 1.3773118  | 2.5382205  |



**\*COOH**

|    |            |            |            |
|----|------------|------------|------------|
| Ni | 0.0476405  | 0.0407813  | 0.0152088  |
| Ni | -2.9667785 | -1.4697227 | -1.2239332 |
| O  | -3.6559685 | -2.8461657 | -2.6199252 |
| O  | -4.3604955 | -2.9598937 | -0.6139082 |
| O  | -5.1724345 | -4.2968807 | -2.1048432 |
| N  | -1.3920005 | -2.6260107 | -0.6208902 |
| N  | -0.3738505 | -2.0521597 | -0.0131632 |
| N  | 0.5265535  | -2.9257607 | 0.3581738  |
| N  | -0.6305625 | 0.0798353  | -2.0007752 |
| N  | -1.7424085 | -0.4691227 | -2.4272382 |
| N  | -4.4355085 | -3.4003197 | -1.7893312 |
| C  | -1.1426565 | -3.9665987 | -0.6687712 |
| C  | -1.8319095 | -5.0707687 | -1.2180822 |
| H  | -2.7681495 | -4.9841047 | -1.7677332 |
| C  | -1.2503395 | -6.3114527 | -1.0706792 |
| H  | -1.7569695 | -7.1854107 | -1.4902542 |
| C  | -0.0100105 | -6.4936077 | -0.4082112 |
| H  | 0.4041655  | -7.5027857 | -0.3281482 |
| C  | 0.6856885  | -5.4292047 | 0.1185818  |
| H  | 1.6561875  | -5.5541317 | 0.6052568  |
| C  | 0.0979205  | -4.1561077 | -0.0235272 |
| C  | -1.8355265 | -0.2566707 | -3.7663582 |
| C  | -2.8101645 | -0.6088497 | -4.7216662 |
| H  | -3.7005145 | -1.1824197 | -4.4497462 |
| C  | -2.5750615 | -0.2050607 | -6.0177462 |
| H  | -3.3018245 | -0.4549887 | -6.7960432 |
| Ni | 1.7217465  | 1.7223183  | -2.7192262 |
| Ni | 2.2104705  | -2.5043867 | 1.4167928  |
| Ni | -0.8098975 | 2.4297303  | 2.6038788  |
| O  | 1.4015095  | 3.2712823  | -4.1660902 |
| O  | 4.1356355  | -2.7435557 | 2.3457838  |
| O  | -1.7832065 | 2.6769553  | 4.5098438  |
| O  | 3.2637305  | 3.1674063  | -3.1280582 |
| O  | 3.4932045  | -4.1372307 | 0.8624168  |
| O  | -2.2777175 | 3.9682653  | 2.8833738  |
| O  | 5.3633075  | -4.4616287 | 1.8933118  |
| O  | -3.1741095 | 4.3007133  | 4.8195048  |
| O  | 2.9938795  | 4.6321513  | -4.6924302 |
| O  | 2.5494535  | 0.6694583  | -4.3699872 |
| O  | 1.5455135  | -3.8018367 | 2.9548168  |
| O  | 0.5861835  | 3.8087223  | 3.4013088  |
| N  | 0.8419575  | 2.7845003  | -1.1803742 |
| N  | 2.9007675  | -1.1925377 | -0.0279532 |
| N  | -2.2044155 | 1.0743313  | 1.8675698  |
| N  | -1.9282115 | 0.3759773  | 0.7893468  |

|   |            |            |            |
|---|------------|------------|------------|
| N | 0.3702825  | 2.1390363  | -0.1352142 |
| N | 2.0628455  | -0.3427137 | -0.5843112 |
| N | -2.9368495 | -0.3895637 | 0.4410638  |
| N | 2.6602965  | 0.4358253  | -1.4537272 |
| N | -0.1189325 | 2.9570023  | 0.7665178  |
| N | 0.7339575  | -0.0133547 | 2.0281048  |
| N | 0.0296365  | 0.6456003  | -2.9799002 |
| N | 1.4975275  | -0.9641867 | 2.5103058  |
| N | 0.4641785  | 0.8971273  | 2.9340608  |
| N | 2.5714315  | 3.7183543  | -4.0257852 |
| N | 4.3632595  | -3.8087717 | 1.7138068  |
| N | -2.4338195 | 3.6784263  | 4.0977228  |
| C | 4.1329175  | -0.9619027 | -0.5621392 |
| C | -3.4674755 | 0.7485643  | 2.2622468  |
| C | 0.6453385  | 4.1151713  | -0.9639382 |
| C | 5.4020755  | -1.5470467 | -0.3614182 |
| C | -4.2711155 | 1.1519543  | 3.3505818  |
| C | 0.9202185  | 5.2694563  | -1.7297192 |
| H | 5.5838615  | -2.3534757 | 0.3472628  |
| H | -3.9138965 | 1.8283423  | 4.1267778  |
| H | 1.3544735  | 5.2320653  | -2.7283252 |
| C | 6.4504655  | -1.0419297 | -1.0991732 |
| C | -5.5378335 | 0.6163903  | 3.4271778  |
| C | 0.5780675  | 6.4842473  | -1.1776062 |
| H | 7.4475425  | -1.4722557 | -0.9670112 |
| H | -6.1864575 | 0.9029243  | 4.2600218  |
| H | 0.7733255  | 7.3986753  | -1.7454162 |
| C | 6.2832125  | 0.0252053  | -2.0188372 |
| C | -6.0260375 | -0.3047867 | 2.4659898  |
| C | -0.0287165 | 6.5886973  | 0.1006598  |
| H | 7.1552745  | 0.3909493  | -2.5685492 |
| H | -7.0419575 | -0.6952097 | 2.5752458  |
| H | -0.2790845 | 7.5810653  | 0.4869648  |
| C | 5.0549475  | 0.6118493  | -2.2248162 |
| C | -5.2491695 | -0.7278157 | 1.4108088  |
| C | -0.3150505 | 5.4744643  | 0.8564258  |
| H | 4.9218925  | 1.4466563  | -2.9164132 |
| H | -5.6169385 | -1.4510747 | 0.6801768  |
| H | -0.7872535 | 5.5467133  | 1.8376148  |
| C | 3.9737105  | 0.0944353  | -1.4834032 |
| C | -3.9490155 | -0.1903797 | 1.3273178  |
| C | 0.0301185  | 4.2252343  | 0.3008128  |
| C | -0.6838245 | 0.4705433  | -4.1244522 |
| C | 1.7571095  | -0.6723457 | 3.8125958  |
| C | 1.0819415  | 0.5336473  | 4.0878788  |
| C | -0.4544215 | 0.8777473  | -5.4543582 |

|   |            |            |            |
|---|------------|------------|------------|
| C | 1.1228475  | 1.1236633  | 5.3673908  |
| C | 2.5191425  | -1.3321727 | 4.7983718  |
| H | 0.4411695  | 1.4404163  | -5.7265182 |
| H | 0.5833865  | 2.0480133  | 5.5870938  |
| H | 3.0525895  | -2.2597967 | 4.5769788  |
| C | -1.4138825 | 0.5283433  | -6.3793582 |
| C | 1.8641615  | 0.4664003  | 6.3250408  |
| C | 2.5565655  | -0.7422887 | 6.0429778  |
| H | -1.2830425 | 0.8215553  | -7.4251102 |
| H | 3.1337865  | -1.2150707 | 6.8430828  |
| H | 1.9247955  | 0.8824323  | 7.3350448  |
| H | 1.6707405  | -4.7523677 | 2.8068598  |
| H | 0.5976655  | -3.7052677 | 3.1392728  |
| H | 1.5117865  | 3.5512733  | 3.2666418  |
| H | 0.5228455  | 4.0234223  | 4.3448318  |
| H | 2.5527225  | -0.2940427 | -4.2541142 |
| H | 3.4586465  | 0.8898063  | -4.6273472 |
| C | -4.4056045 | -0.2211317 | -1.7888022 |
| O | -5.5236405 | -0.8666567 | -2.0011652 |
| H | -6.2269195 | -0.2349157 | -2.2658772 |
| O | -4.1966435 | 0.9457733  | -1.8890022 |

**\*OCOH**

|    |            |            |            |
|----|------------|------------|------------|
| Ni | -0.0660254 | 0.0010857  | -0.0430792 |
| Ni | 3.0893986  | -1.7411343 | -0.1613122 |
| O  | 4.1208566  | -3.4867763 | 0.4921378  |
| O  | 4.3255396  | -2.8337693 | -1.5292192 |
| O  | 5.4571666  | -4.5398153 | -0.8396042 |
| N  | 1.3453596  | -2.7046403 | -0.6482962 |
| N  | 0.2246476  | -2.0154723 | -0.6929162 |
| N  | -0.8058054 | -2.7789893 | -0.9575692 |
| N  | 1.1333706  | -0.4783963 | 1.6363598  |
| N  | 2.2775946  | -1.1203553 | 1.5741168  |
| N  | 4.6712176  | -3.6486943 | -0.6335092 |
| C  | 1.0379526  | -4.0093683 | -0.8929262 |
| C  | 1.8078366  | -5.1915363 | -0.9560022 |
| H  | 2.8836266  | -5.2139783 | -0.7827942 |
| C  | 1.1347496  | -6.3632603 | -1.2262312 |
| H  | 1.6990746  | -7.2988413 | -1.2791622 |
| C  | -0.2696604 | -6.4001733 | -1.4244212 |
| H  | -0.7503034 | -7.3627883 | -1.6222282 |
| C  | -1.0378564 | -5.2594463 | -1.3592032 |
| H  | -2.1233444 | -5.2845903 | -1.4823012 |
| C  | -0.3577684 | -4.0535903 | -1.0941252 |
| C  | 2.7313766  | -1.2882933 | 2.8444298  |
| C  | 3.8737716  | -1.9257313 | 3.3725108  |
| H  | 4.5893856  | -2.4495703 | 2.7322538  |
| C  | 4.0234866  | -1.8898603 | 4.7423268  |
| H  | 4.8922046  | -2.3739053 | 5.1982938  |
| Ni | -0.8544784 | 0.8255497  | 3.3937588  |
| Ni | -2.6765114 | -2.1282533 | -1.3749592 |
| Ni | 0.1308646  | 3.0347187  | -2.0219972 |
| O  | -0.0969444 | 1.9156827  | 5.0853018  |
| O  | -4.7825904 | -2.1561313 | -1.8052912 |
| O  | 0.5634286  | 3.7706267  | -3.9921062 |
| O  | -2.1671354 | 2.0424837  | 4.5797228  |
| O  | -3.8640764 | -3.8738453 | -0.9301202 |
| O  | 1.3968276  | 4.7578307  | -2.2919682 |
| O  | -5.9464624 | -3.9479603 | -1.4982602 |
| O  | 1.7336946  | 5.5655767  | -4.2656912 |
| O  | -1.4401914 | 3.0262137  | 6.3601148  |
| O  | -1.2630854 | -0.6870563 | 4.8277398  |
| O  | -2.4890164 | -2.9807013 | -3.3099152 |
| O  | -1.4673724 | 4.4278527  | -2.0810312 |
| N  | -0.4051714 | 2.2999777  | 2.0193278  |
| N  | -2.9013024 | -1.2425933 | 0.4589658  |
| N  | 1.7120066  | 1.7025767  | -1.9707522 |
| N  | 1.6382956  | 0.6498187  | -1.1845042 |

|   |            |            |            |
|---|------------|------------|------------|
| N | -0.2748624 | 1.9791767  | 0.7485728  |
| N | -1.8848344 | -0.5832913 | 0.9713678  |
| N | 2.7158416  | -0.0929743 | -1.2622862 |
| N | -2.1761264 | -0.0741673 | 2.1436698  |
| N | -0.0923254 | 3.0366497  | -0.0053642 |
| N | -1.2603604 | 0.4385587  | -1.7299592 |
| N | 0.8011856  | -0.2019613 | 2.8731028  |
| N | -2.1863504 | -0.3607533 | -2.1998872 |
| N | -1.1638274 | 1.5385677  | -2.4379342 |
| N | -1.2427234 | 2.3463567  | 5.3822318  |
| N | -4.8997044 | -3.3500143 | -1.4217012 |
| N | 1.2424556  | 4.7336517  | -3.5404392 |
| C | -3.9345224 | -1.1619213 | 1.3434658  |
| C | 2.9124676  | 1.6518067  | -2.6138522 |
| C | -0.2874884 | 3.6534077  | 2.1153688  |
| C | -5.2566494 | -1.6564253 | 1.3333868  |
| C | 3.5297856  | 2.4810787  | -3.5758812 |
| C | -0.3095094 | 4.5486247  | 3.2069848  |
| H | -5.6750234 | -2.2269733 | 0.5043228  |
| H | 3.0595366  | 3.3731777  | -3.9888262 |
| H | -0.4093274 | 4.2256357  | 4.2423628  |
| C | -6.0410264 | -1.3680513 | 2.4291788  |
| C | 4.7820136  | 2.1081227  | -4.0133662 |
| C | -0.1589424 | 5.8879127  | 2.9225678  |
| H | -7.0721304 | -1.7323813 | 2.4542908  |
| H | 5.2883156  | 2.7256537  | -4.7609492 |
| H | -0.1669494 | 6.6097517  | 3.7444208  |
| C | -5.5604584 | -0.6020603 | 3.5226878  |
| C | 5.4368446  | 0.9457937  | -3.5304532 |
| C | 0.0154866  | 6.3629937  | 1.5970878  |
| H | -6.2340694 | -0.3962313 | 4.3595708  |
| H | 6.4321256  | 0.7024877  | -3.9137022 |
| H | 0.1276006  | 7.4385737  | 1.4322598  |
| C | -4.2761924 | -0.1051903 | 3.5468048  |
| C | 4.8477406  | 0.1207917  | -2.5984222 |
| C | 0.0547876  | 5.5043327  | 0.5217728  |
| H | -3.9061714 | 0.5054737  | 4.3747358  |
| H | 5.3390706  | -0.7794513 | -2.2229932 |
| H | 0.1952356  | 5.8624577  | -0.4995152 |
| C | -3.4619374 | -0.4032603 | 2.4350628  |
| C | 3.5642836  | 0.4907627  | -2.1484042 |
| C | -0.0956604 | 4.1303077  | 0.8015628  |
| C | 1.7802276  | -0.6782083 | 3.6867248  |
| C | -2.7492884 | 0.2399797  | -3.2818072 |
| C | -2.0784134 | 1.4686667  | -3.4405602 |
| C | 1.9479946  | -0.6410383 | 5.0860848  |

|   |            |            |            |
|---|------------|------------|------------|
| C | -2.3956664 | 2.3484447  | -4.4952532 |
| C | -3.7910024 | -0.1486023 | -4.1488682 |
| H | 1.2165866  | -0.1515373 | 5.7327348  |
| H | -1.8542034 | 3.2864287  | -4.6378312 |
| H | -4.3225444 | -1.0927353 | -4.0076302 |
| C | 3.0787556  | -1.2481913 | 5.5868888  |
| C | -3.4080524 | 1.9543857  | -5.3425162 |
| C | -4.1015914 | 0.7265257  | -5.1672702 |
| H | 3.2558616  | -1.2458533 | 6.6663138  |
| H | -4.9042214 | 0.4731047  | -5.8660832 |
| H | -3.6895804 | 2.6017397  | -6.1783512 |
| H | -2.6041544 | -3.9414703 | -3.3764072 |
| H | -1.6235884 | -2.8078573 | -3.7135432 |
| H | -2.3038954 | 4.0775677  | -1.7365322 |
| H | -1.6974064 | 4.8359447  | -2.9300822 |
| H | -1.3560414 | -1.5660763 | 4.4271068  |
| H | -2.0678294 | -0.5733233 | 5.3574378  |
| C | 5.8873516  | -1.0269063 | 1.0831708  |
| O | 4.9584576  | -0.6875233 | 0.4041028  |
| O | 6.8977216  | -0.3742993 | 1.5291828  |
| H | 6.8782826  | 0.5733527  | 1.2542248  |

**\*OCHO**

|    |            |            |            |
|----|------------|------------|------------|
| Ni | -0.0978130 | -0.0205327 | -0.0227146 |
| Ni | 2.6394440  | -2.2270037 | 0.9038694  |
| O  | 3.1265580  | -3.9248067 | 2.0874474  |
| O  | 3.8028390  | -3.8363107 | 0.0644304  |
| O  | 4.4502080  | -5.4572957 | 1.3368644  |
| N  | 0.8368030  | -2.9795957 | 0.2518364  |
| N  | -0.1142000 | -2.1541607 | -0.1330226 |
| N  | -1.2200550 | -2.7893167 | -0.4367286 |
| N  | 0.7234540  | -0.2426617 | 1.9449554  |
| N  | 1.7163270  | -1.0459637 | 2.2459734  |
| N  | 3.8240940  | -4.4387547 | 1.1700114  |
| C  | 0.3260090  | -4.2439947 | 0.2070094  |
| C  | 0.8573500  | -5.5182237 | 0.5057814  |
| H  | 1.8728860  | -5.6744867 | 0.8667594  |
| C  | 0.0224270  | -6.6021317 | 0.3411454  |
| H  | 0.4022910  | -7.6028547 | 0.5664704  |
| C  | -1.3179900 | -6.4635547 | -0.1013016 |
| H  | -1.9367910 | -7.3598057 | -0.2020596 |
| C  | -1.8549660 | -5.2306937 | -0.3949816 |
| H  | -2.8925010 | -5.1127267 | -0.7164486 |
| C  | -1.0060340 | -4.1158747 | -0.2379156 |
| C  | 1.9611840  | -0.9307847 | 3.5762344  |
| C  | 2.9058270  | -1.5523947 | 4.4175424  |
| H  | 3.6204910  | -2.2795737 | 4.0240444  |
| C  | 2.8772550  | -1.1882577 | 5.7460164  |
| H  | 3.5904330  | -1.6393387 | 6.4423934  |
| Ni | -1.1609840 | 1.8078623  | 2.9258864  |
| Ni | -2.8648330 | -1.9739867 | -1.3148756 |
| Ni | 1.0072350  | 2.3001603  | -2.5878426 |
| O  | -0.4559700 | 3.2161213  | 4.4016404  |
| O  | -4.8890810 | -1.8362837 | -2.0426466 |
| O  | 1.8738200  | 2.3378633  | -4.5359776 |
| O  | -2.3560800 | 3.5076713  | 3.4735624  |
| O  | -4.3760730 | -3.2924577 | -0.5686006 |
| O  | 2.6339450  | 3.6510903  | -3.0346966 |
| O  | -6.3845800 | -3.2379237 | -1.3601736 |
| O  | 3.3999640  | 3.7765843  | -5.0502776 |
| O  | -1.7094150 | 4.8603303  | 5.0274354  |
| O  | -2.0670730 | 0.8646563  | 4.5952454  |
| O  | -2.6340930 | -3.3463167 | -2.9192086 |
| O  | -0.2410800 | 3.8542683  | -3.2968516 |
| N  | -0.2238130 | 2.7636783  | 1.3452164  |
| N  | -3.1511570 | -0.5668487 | 0.1730634  |
| N  | 2.2817140  | 0.8418733  | -1.8534046 |
| N  | 1.8389080  | 0.0434483  | -0.8979456 |

|   |            |            |            |
|---|------------|------------|------------|
| N | -0.0069830 | 2.1032903  | 0.2271434  |
| N | -2.1006370 | -0.0015907 | 0.7317544  |
| N | 2.7918480  | -0.7684827 | -0.4941386 |
| N | -2.4421900 | 0.8137233  | 1.7003284  |
| N | 0.4910340  | 2.8761023  | -0.7083966 |
| N | -0.9124460 | 0.1313043  | -1.9875836 |
| N | 0.2870400  | 0.4007833  | 3.0018954  |
| N | -1.8935470 | -0.6115877 | -2.4451706 |
| N | -0.4654570 | 0.9575623  | -2.9017006 |
| N | -1.5168940 | 3.8915043  | 4.3322704  |
| N | -5.2563450 | -2.8094447 | -1.3310296 |
| N | 2.6576680  | 3.2805663  | -4.2365716 |
| C | -4.2601210 | -0.0858557 | 0.8031844  |
| C | 3.5817630  | 0.5341083  | -2.0812316 |
| C | 0.1660540  | 4.0538143  | 1.1422954  |
| C | -5.6452820 | -0.2936227 | 0.6206864  |
| C | 4.5316930  | 0.9866403  | -3.0471166 |
| C | 0.2016410  | 5.1957393  | 1.9724024  |
| H | -6.0549270 | -0.9194557 | -0.1717616 |
| H | 4.3287590  | 1.7731313  | -3.7735386 |
| H | -0.0898840 | 5.1791243  | 3.0224194  |
| C | -6.4977930 | 0.3764153  | 1.4709494  |
| C | 5.7727950  | 0.3212433  | -3.0687826 |
| C | 0.6733760  | 6.3631663  | 1.4126804  |
| H | -7.5771200 | 0.2418233  | 1.3549014  |
| H | 6.4952760  | 0.6053323  | -3.8397226 |
| H | 0.7183320  | 7.2661933  | 2.0285074  |
| C | -6.0233430 | 1.2500853  | 2.4827904  |
| C | 6.1179170  | -0.6748347 | -2.1837446 |
| C | 1.1149380  | 6.4310163  | 0.0661144  |
| H | -6.7482880 | 1.7587283  | 3.1248764  |
| H | 7.0986580  | -1.1556577 | -2.2480356 |
| H | 1.4818610  | 7.3857823  | -0.3221126 |
| C | -4.6782280 | 1.4828993  | 2.6607234  |
| C | 5.2484640  | -1.0811397 | -1.0419016 |
| C | 1.1025530  | 5.3253303  | -0.7533266 |
| H | -4.3073330 | 2.1754913  | 3.4188774  |
| H | 5.2109430  | -2.1762467 | -0.9046456 |
| H | 1.4523380  | 5.3677123  | -1.7861146 |
| C | -3.7964370 | 0.7994103  | 1.7989624  |
| C | 3.8994010  | -0.4909957 | -1.1877566 |
| C | 0.6204340  | 4.1257863  | -0.1913526 |
| C | 1.0345110  | 0.0093613  | 4.0687444  |
| C | -2.1198530 | -0.2548197 | -3.7370876 |
| C | -1.1875370 | 0.7586783  | -4.0358136 |
| C | 1.0185700  | 0.3756693  | 5.4303624  |



|   |            |            |            |
|---|------------|------------|------------|
| C | -1.1295170 | 1.3528333  | -5.3133176 |
| C | -3.0552800 | -0.6988117 | -4.6937536 |
| H | 0.3064700  | 1.1070993  | 5.8173794  |
| H | -0.3850160 | 2.1165083  | -5.5518206 |
| H | -3.7864050 | -1.4753247 | -4.4597586 |
| C | 1.9473450  | -0.2363087 | 6.2441084  |
| C | -2.0442800 | 0.9056383  | -6.2421086 |
| C | -2.9980490 | -0.1013967 | -5.9343686 |
| H | 1.9742730  | 0.0154363  | 7.3084494  |
| H | -3.7035790 | -0.4108137 | -6.7110206 |
| H | -2.0390610 | 1.3335083  | -7.2489606 |
| H | -3.0887280 | -4.2012447 | -2.8631026 |
| H | -1.7105090 | -3.5709847 | -3.1142206 |
| H | -1.1689930 | 3.7619523  | -3.0289436 |
| H | -0.2733250 | 4.0263353  | -4.2507796 |
| H | -2.3770010 | -0.0379997 | 4.4206974  |
| H | -2.8196800 | 1.3080303  | 5.0171114  |
| C | 5.5215550  | -0.8725307 | 1.3549994  |
| O | 5.9329890  | -0.5464957 | 0.1585734  |
| O | 4.5485120  | -1.5411657 | 1.6366014  |
| H | 6.1941710  | -0.4487467 | 2.1268424  |

**\*CO**

|    |            |            |            |
|----|------------|------------|------------|
| Ni | 0.0241512  | -0.0003132 | 0.0232755  |
| Ni | 2.7529852  | -1.3261992 | 2.0363415  |
| O  | 4.7066482  | -2.9783792 | 3.3364905  |
| O  | 4.1840472  | -2.3709162 | 1.3200295  |
| O  | 5.8943982  | -3.6060622 | 1.6533865  |
| N  | 1.5288792  | -2.4541162 | 1.1347685  |
| N  | 0.6612202  | -2.0085272 | 0.2374435  |
| N  | 0.0437732  | -2.9823212 | -0.3636205 |
| N  | 0.3192692  | 0.1378108  | 2.1622505  |
| N  | 1.3136112  | -0.3993492 | 2.8321645  |
| N  | 4.9580932  | -3.0086882 | 2.1385835  |
| C  | 1.4776222  | -3.8099542 | 1.1299755  |
| C  | 2.1480622  | -4.7955292 | 1.8795175  |
| H  | 2.8630202  | -4.5310712 | 2.6638535  |
| C  | 1.8280942  | -6.1059372 | 1.5938565  |
| H  | 2.3193992  | -6.9096302 | 2.1503545  |
| C  | 0.8707722  | -6.4507682 | 0.6016555  |
| H  | 0.6584582  | -7.5090382 | 0.4232165  |
| C  | 0.1995822  | -5.4914362 | -0.1255495 |
| H  | -0.5542488 | -5.7532082 | -0.8735105 |
| C  | 0.5169772  | -4.1461472 | 0.1536035  |
| C  | 1.1519952  | -0.1252072 | 4.1555265  |
| C  | 1.8986082  | -0.4738642 | 5.2963895  |
| H  | 2.7791992  | -1.1204422 | 5.2307735  |
| C  | 1.4443372  | 0.0234988  | 6.4986805  |
| H  | 1.9871702  | -0.2186782 | 7.4167025  |
| Ni | -2.1003558 | 1.6147248  | 2.4823435  |
| Ni | -1.7226878 | -2.5436322 | -1.8837615 |
| Ni | 1.2219152  | 2.2949978  | -2.5243535 |
| O  | -3.8329928 | 3.2474818  | 4.1036215  |
| O  | -3.6708348 | -4.2311042 | -3.0125165 |
| O  | 2.7088862  | 4.0041478  | -4.2431015 |
| O  | -3.6929968 | 2.5847098  | 2.0450345  |
| O  | -2.6154168 | -4.0544932 | -1.1312505 |
| O  | 2.2628012  | 3.8505838  | -2.1295015 |
| O  | -3.9334948 | -5.7051492 | -1.4644965 |
| O  | 3.2099562  | 5.6064298  | -2.8950375 |
| O  | -5.4002758 | 3.6913458  | 2.6974225  |
| O  | -3.0043068 | 0.6428138  | 3.9118175  |
| O  | -0.7811178 | -3.7012982 | -3.1487375 |
| O  | 0.0674992  | 3.4250838  | -3.6136555 |
| N  | -1.2005588 | 2.5902598  | 1.1660695  |
| N  | -2.6339778 | -1.4154932 | -0.6957975 |
| N  | 2.3994412  | 1.2769748  | -1.4844925 |
| N  | 2.0164182  | 0.5772488  | -0.4295625 |

|   |            |            |            |
|---|------------|------------|------------|
| N | -0.5705828 | 2.0264228  | 0.1453515  |
| N | -2.0034998 | -0.6261302 | 0.1623645  |
| N | 3.0315262  | 0.0369758  | 0.1836665  |
| N | -2.8308858 | -0.0440262 | 0.9829605  |
| N | -0.1086878 | 2.9126978  | -0.6880525 |
| N | -0.2442248 | -0.1113022 | -2.1083015 |
| N | -0.4891038 | 0.7666158  | 2.9769935  |
| N | -0.9163428 | -1.0568722 | -2.7186595 |
| N | 0.2513652  | 0.7371428  | -2.9796115 |
| N | -4.3304378 | 3.1948728  | 2.9783385  |
| N | -3.4363468 | -4.6864022 | -1.8987195 |
| N | 2.7417622  | 4.5098038  | -3.1231075 |
| C | -3.9633288 | -1.3432692 | -0.4322475 |
| C | 3.7501242  | 1.1925198  | -1.5787445 |
| C | -1.1431648 | 3.9350578  | 1.0015635  |
| C | -5.0920588 | -1.9361392 | -1.0308425 |
| C | 4.6761972  | 1.7169838  | -2.5001875 |
| C | -1.6049178 | 5.0121808  | 1.7822445  |
| H | -5.0022288 | -2.5965092 | -1.8977755 |
| H | 4.3522992  | 2.3208558  | -3.3529325 |
| H | -2.1217058 | 4.8522138  | 2.7325355  |
| C | -6.3168508 | -1.6135032 | -0.4865035 |
| C | 6.0015512  | 1.4094078  | -2.2776705 |
| C | -1.3374518 | 6.2761008  | 1.3013155  |
| H | -7.2242938 | -2.0447382 | -0.9198725 |
| H | 6.7616812  | 1.7903988  | -2.9662015 |
| H | -1.6680878 | 7.1476628  | 1.8743245  |
| C | -6.4435008 | -0.7282832 | 0.6178145  |
| C | 6.4163352  | 0.6026378  | -1.1832635 |
| C | -0.6308978 | 6.4876758  | 0.0861725  |
| H | -7.4436278 | -0.5084442 | 1.0028945  |
| H | 7.4826242  | 0.3885488  | -1.0647415 |
| H | -0.4426558 | 7.5156158  | -0.2378165 |
| C | -5.3455208 | -0.1347812 | 1.2016705  |
| C | 5.5148082  | 0.0778278  | -0.2825825 |
| C | -0.1678588 | 5.4393508  | -0.6791535 |
| H | -5.4450798 | 0.5635318  | 2.0376485  |
| H | 5.8237042  | -0.5661162 | 0.5461065  |
| H | 0.4013372  | 5.6001098  | -1.5990585 |
| C | -4.0842348 | -0.4558872 | 0.6571885  |
| C | 4.1554852  | 0.3892958  | -0.4936115 |
| C | -0.4365228 | 4.1387068  | -0.2022635 |
| C | -0.0128438 | 0.6559158  | 4.2460485  |
| C | -0.8780978 | -0.8275052 | -4.0582315 |
| C | -0.0986708 | 0.3302428  | -4.2305425 |
| C | -0.4585558 | 1.1749998  | 5.4757265  |

|   |            |            |            |
|---|------------|------------|------------|
| C | 0.1856462  | 0.8380458  | -5.5130365 |
| C | -1.4539438 | -1.5059062 | -5.1488715 |
| H | -1.3407198 | 1.8169188  | 5.5334065  |
| H | 0.8246622  | 1.7139698  | -5.6500415 |
| H | -2.0758388 | -2.3912952 | -4.9947335 |
| C | 0.2894392  | 0.8464548  | 6.5852735  |
| C | -0.3695238 | 0.1606488  | -6.5766955 |
| C | -1.1878468 | -0.9879052 | -6.3970815 |
| H | -0.0116628 | 1.2254738  | 7.5659785  |
| H | -1.6118268 | -1.4729442 | -7.2809915 |
| H | -0.1778738 | 0.5129218  | -7.5943175 |
| H | -0.8494858 | -4.6517452 | -2.9586515 |
| H | 0.1740152  | -3.5170252 | -3.1530095 |
| H | -0.8274428 | 3.1128308  | -3.8237485 |
| H | 0.4669302  | 3.7138928  | -4.4520475 |
| H | -3.6182248 | -0.0379052 | 3.5904405  |
| H | -3.5371758 | 1.2660508  | 4.4409715  |
| C | 3.9942802  | -0.2841712 | 2.9560515  |
| O | 4.7840362  | 0.3780658  | 3.4126675  |

**\*OC**

|    |            |            |            |
|----|------------|------------|------------|
| Ni | 0.0205193  | -0.0457321 | -0.0287063 |
| Ni | 3.1938893  | -0.2707351 | -1.6404343 |
| O  | 4.5532313  | 0.6731599  | -2.9556653 |
| O  | 5.2435603  | -0.1288901 | -1.1074723 |
| O  | 6.6709523  | 0.6522049  | -2.5273503 |
| N  | 2.7860403  | 1.2613899  | -0.5552063 |
| N  | 1.6776393  | 1.2754469  | 0.1589627  |
| N  | 1.5189433  | 2.4111899  | 0.7985667  |
| N  | 0.3446113  | 0.0320409  | -2.1344903 |
| N  | 1.5202083  | -0.0794581 | -2.6983153 |
| N  | 5.5358513  | 0.4061819  | -2.2089193 |
| C  | 3.3961843  | 2.4704509  | -0.3774613 |
| C  | 4.5689383  | 3.0606469  | -0.9004393 |
| H  | 5.2094053  | 2.5680269  | -1.6294213 |
| C  | 4.8713513  | 4.3426399  | -0.4956853 |
| H  | 5.7706013  | 4.8242899  | -0.8911343 |
| C  | 4.0455503  | 5.0678299  | 0.4001507  |
| H  | 4.3293553  | 6.0871889  | 0.6775937  |
| C  | 2.8880963  | 4.5211779  | 0.9062807  |
| H  | 2.2250873  | 5.0814199  | 1.5695247  |
| C  | 2.5772183  | 3.2059519  | 0.5046487  |
| C  | 1.3521563  | 0.0304549  | -4.0417183 |
| C  | 2.2634983  | 0.0262379  | -5.1159543 |
| H  | 3.3409523  | -0.0527031 | -4.9567803 |
| C  | 1.7276893  | 0.1718449  | -6.3776803 |
| H  | 2.3962983  | 0.1791709  | -7.2434893 |
| Ni | -2.5548857 | 0.3202209  | -2.5545723 |
| Ni | 0.0491473  | 2.8219659  | 2.1407487  |
| Ni | -0.6322537 | -3.0174511 | 1.9417727  |
| O  | -3.4386517 | -0.6661411 | -4.2689293 |
| O  | -1.2114847 | 3.9069319  | 3.5113937  |
| O  | 0.1069893  | -4.2228441 | 3.5593957  |
| O  | -4.6784467 | 0.2011819  | -2.7632473 |
| O  | -0.0322967 | 4.9767549  | 2.0901977  |
| O  | -0.4738057 | -5.1544291 | 1.7281447  |
| O  | -1.1802367 | 6.0657569  | 3.5602967  |
| O  | 0.1430093  | -6.3763321 | 3.3990187  |
| O  | -5.5818697 | -0.6540411 | -4.5288273 |
| O  | -2.6983657 | 2.0439659  | -3.7801373 |
| O  | 1.5258533  | 3.1031639  | 3.6374137  |
| O  | -2.5132197 | -3.3892581 | 2.8538877  |
| N  | -2.4039677 | -1.4054271 | -1.4424093 |
| N  | -1.4635107 | 2.5413099  | 0.7720547  |
| N  | 1.2207163  | -2.6361451 | 1.0962247  |
| N  | 1.3547523  | -1.6253481 | 0.2673667  |

|   |            |            |            |
|---|------------|------------|------------|
| N | -1.5778047 | -1.4365871 | -0.4175753 |
| N | -1.3714797 | 1.5649689  | -0.1077743 |
| N | 2.5767993  | -1.5222641 | -0.1985623 |
| N | -2.3966027 | 1.5337799  | -0.9242683 |
| N | -1.6594227 | -2.5621681 | 0.2478297  |
| N | -0.3087087 | -0.0934001 | 2.0755837  |
| N | -0.6032107 | 0.2337859  | -3.0162573 |
| N | -0.2126777 | 0.9604879  | 2.8502227  |
| N | -0.5781857 | -1.1771381 | 2.7620947  |
| N | -4.5999267 | -0.3756571 | -3.8828673 |
| N | -0.8150607 | 5.0203039  | 3.0766687  |
| N | -0.0783267 | -5.2929411 | 2.9143917  |
| C | -2.6317557 | 3.1979439  | 0.5252967  |
| C | 2.4227963  | -3.2710811 | 1.1616727  |
| C | -3.0734467 | -2.5928981 | -1.4617453 |
| C | -3.2718667 | 4.2969919  | 1.1402957  |
| C | 2.8858503  | -4.3814881 | 1.9000237  |
| C | -4.0464967 | -3.1415891 | -2.3271553 |
| H | -2.8701307 | 4.8116239  | 2.0132937  |
| H | 2.2630643  | -4.9222591 | 2.6130127  |
| H | -4.4089417 | -2.6302521 | -3.2185713 |
| C | -4.4796937 | 4.6957859  | 0.6100737  |
| C | 4.2030473  | -4.7446571 | 1.7232047  |
| C | -4.5126747 | -4.4031891 | -2.0266313 |
| H | -5.0055957 | 5.5399209  | 1.0651447  |
| H | 4.5990613  | -5.5976771 | 2.2820407  |
| H | -5.2649677 | -4.8598581 | -2.6763963 |
| C | -5.0746807 | 4.0384819  | -0.4973953 |
| C | 5.0716723  | -4.0338961 | 0.8545227  |
| C | -4.0399817 | -5.1364161 | -0.9078053 |
| H | -6.0407657 | 4.3948619  | -0.8659683 |
| H | 6.1104093  | -4.3640301 | 0.7595917  |
| H | -4.4434767 | -6.1363161 | -0.7224453 |
| C | -4.4736357 | 2.9574229  | -1.1023013 |
| C | 4.6446383  | -2.9315301 | 0.1477417  |
| C | -3.0792777 | -4.6267551 | -0.0639263 |
| H | -4.9398337 | 2.4262699  | -1.9364953 |
| H | 5.3161483  | -2.3633301 | -0.4994793 |
| H | -2.6986757 | -5.1912391 | 0.7891117  |
| C | -3.2331557 | 2.5442269  | -0.5731393 |
| C | 3.2973823  | -2.5545571 | 0.3157107  |
| C | -2.5984277 | -3.3347611 | -0.3583463 |
| C | -0.0319847 | 0.2128729  | -4.2518063 |
| C | -0.4469587 | 0.5617859  | 4.1295027  |
| C | -0.6766377 | -0.8274831 | 4.0700337  |
| C | -0.5664647 | 0.3602079  | -5.5479363 |

|   |            |            |            |
|---|------------|------------|------------|
| C | -0.9279237 | -1.5851211 | 5.2304827  |
| C | -0.4772517 | 1.2589179  | 5.3544717  |
| H | -1.6383397 | 0.4901079  | -5.7090123 |
| H | -1.0801277 | -2.6658501 | 5.1788617  |
| H | -0.3031757 | 2.3359889  | 5.3992067  |
| C | 0.3321773  | 0.3259409  | -6.5921383 |
| C | -0.9550887 | -0.8927871 | 6.4221197  |
| C | -0.7384217 | 0.5101559  | 6.4819817  |
| H | -0.0342497 | 0.4296409  | -7.6176553 |
| H | -0.7771717 | 1.0053589  | 7.4566367  |
| H | -1.1468337 | -1.4347271 | 7.3529117  |
| H | 1.9503703  | 3.9741099  | 3.6783867  |
| H | 2.2607113  | 2.4730059  | 3.5656307  |
| H | -3.0691887 | -2.5961711 | 2.9107117  |
| H | -2.5103747 | -3.7546161 | 3.7527127  |
| H | -2.1181227 | 2.7669659  | -3.4929623 |
| H | -3.5733487 | 2.4528809  | -3.8708513 |
| C | 4.1726653  | -2.6073951 | -3.5740953 |
| O | 3.7884533  | -1.9379701 | -2.7188183 |

## References

1. G. Sheldrick, SHELXT - Integrated space-group and crystal-structure determination. *Acta Crystallogr., Sect. A: Found. Crystallogr.* 71, 3-8 (2015).
2. G. Sheldrick, Crystal structure refinement with SHELXL. *Acta Crystallogr., Sect. C: Cryst. Struct. Commun.* 71, 3-8 (2015).
3. O. V. Dolomanov, L. J. Bourhis, R. J. Gildea, J. A. K. Howard, H. Puschmann, OLEX2: a complete structure solution, refinement and analysis program. *J. Appl. Crystallogr.* 42, 339-341 (2009).
4. A. Spek, PLATON SQUEEZE: a tool for the calculation of the disordered solvent contribution to the calculated structure factors. *Acta Crystallogr., Sect. C: Cryst. Struct. Commun.* 71, 9-18 (2015).
